# Supplementary material for: Effects of oxygen vacancy formation energy and Pt doping on the CO2 hydrogenation activity of In2O3 catalysts
Source: Royal Society of Chemistry journal article supplement (doi:10.1039/d4cy01439a), 2025-01-01
Supplement: d4cy01439a1.pdf [file d4cy01439a1.pdf]

## Electronic Supplementary Information

### Effects of oxygen vacancy formation energy and CO<sub>2</sub> hydrogenation activity in Pt-doped In<sub>2</sub>O<sub>3</sub> catalysts

Zhangqian Wei,<sup>ab†</sup> Yuanjie Bao,<sup>ab†</sup> Yuchen Wang,<sup>ac</sup> Shenggang Li,<sup>abcd\*</sup>

<sup>a</sup> CAS Key Laboratory of Low-Carbon Conversion Science and Engineering,  
Shanghai Advanced Research Institute, Chinese Academy of Sciences, Shanghai  
201203, P. R. China

<sup>b</sup> University of Chinese Academy of Sciences, Beijing 100049, P. R. China

<sup>c</sup> School of Physical Science and Technology, ShanghaiTech University, Shanghai  
201210, P. R.

<sup>d</sup> State Key Laboratory of Low Carbon Catalysis and Carbon Dioxide Utilization,  
Shanghai Advanced Research Institute, Chinese Academy of Sciences, Shanghai  
201210, China

<sup>†</sup> These authors contributed equally.

\*Corresponding author. Tel: +86-021-20350994. Email: lisg@sari.ac.cn (S. Li).

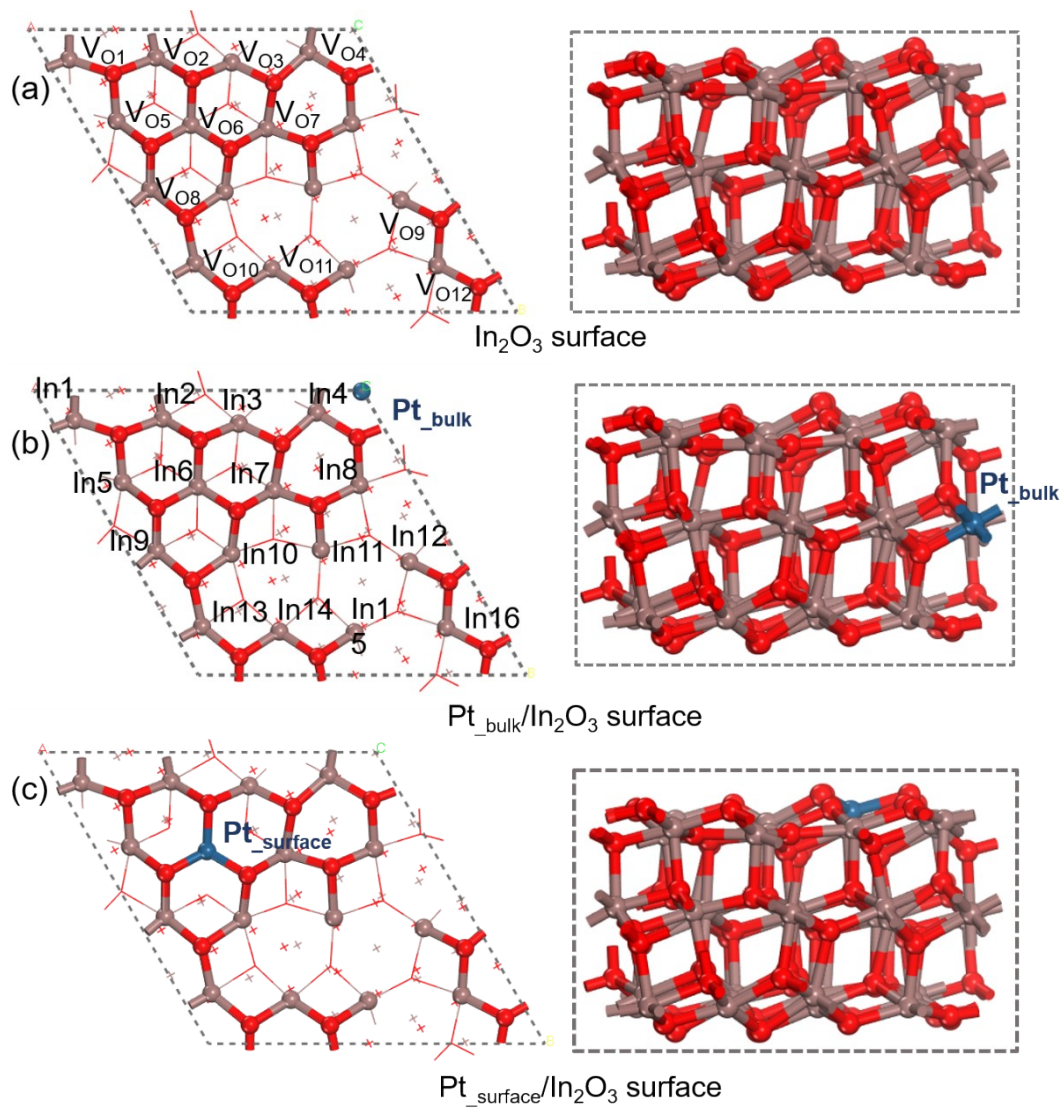

**Fig. S1** Models of the (a)  $\text{In}_2\text{O}_3$  (111), (b)  $\text{Pt}_{\text{bulk}}/\text{In}_2\text{O}_3$  (111) surfaces and (c)  $\text{Pt}_{\text{surface}}/\text{In}_2\text{O}_3$  (111).

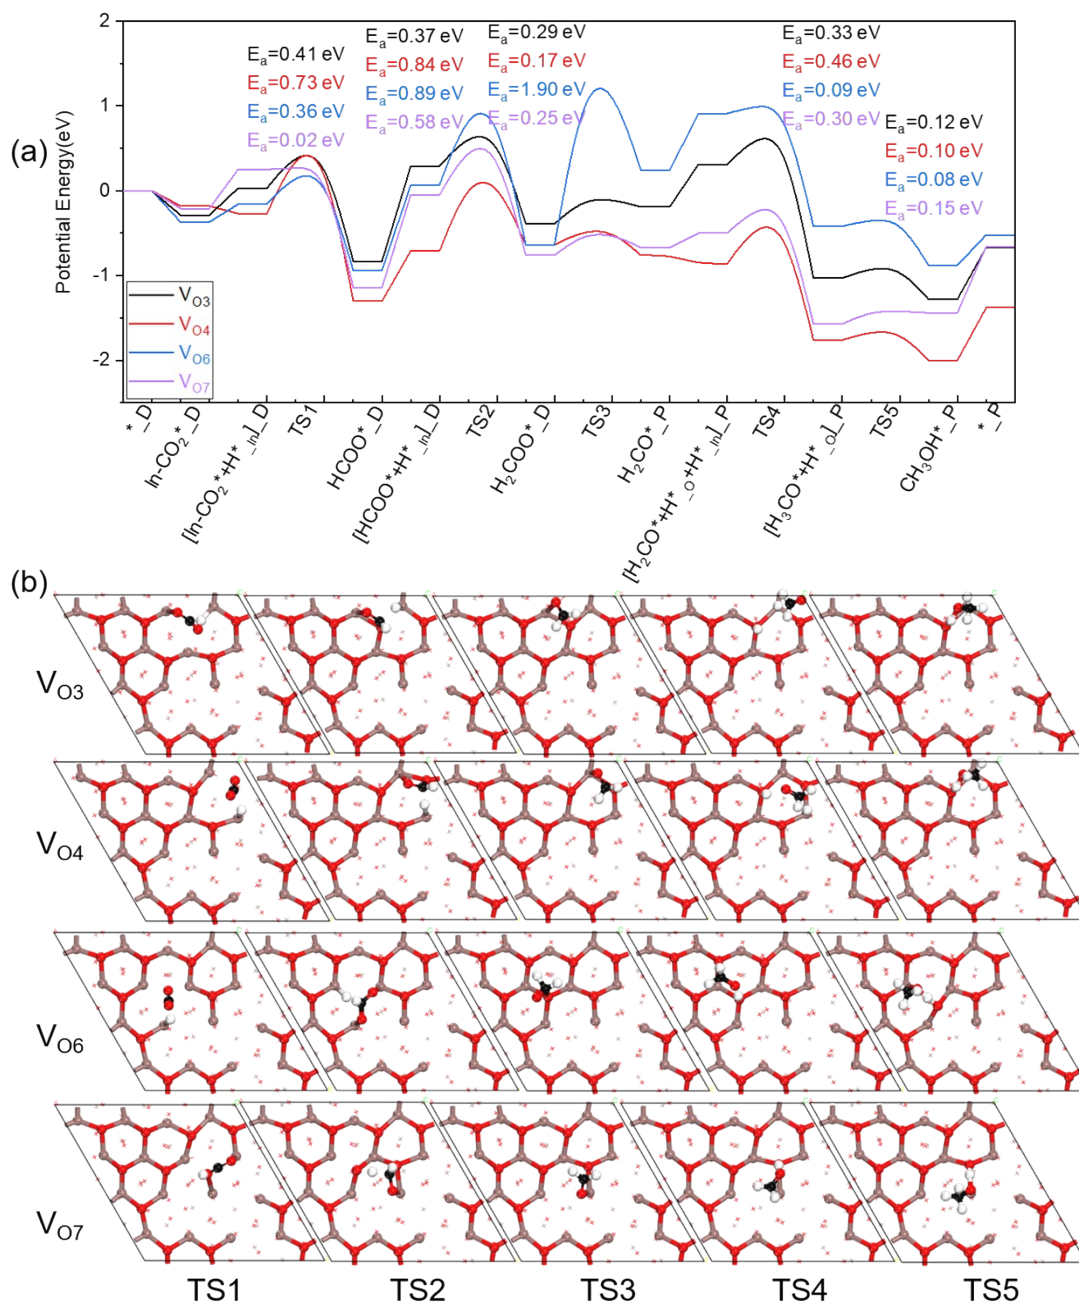

**Fig. S2** (a) Energy profiles of CO<sub>2</sub> hydrogenation to methanol on In<sub>2</sub>O<sub>3</sub> surface; (b) the structures of transition states. <sub>D</sub> represents a defective surface, <sub>P</sub> represents a perfect surface, and \* represents the adsorption site.

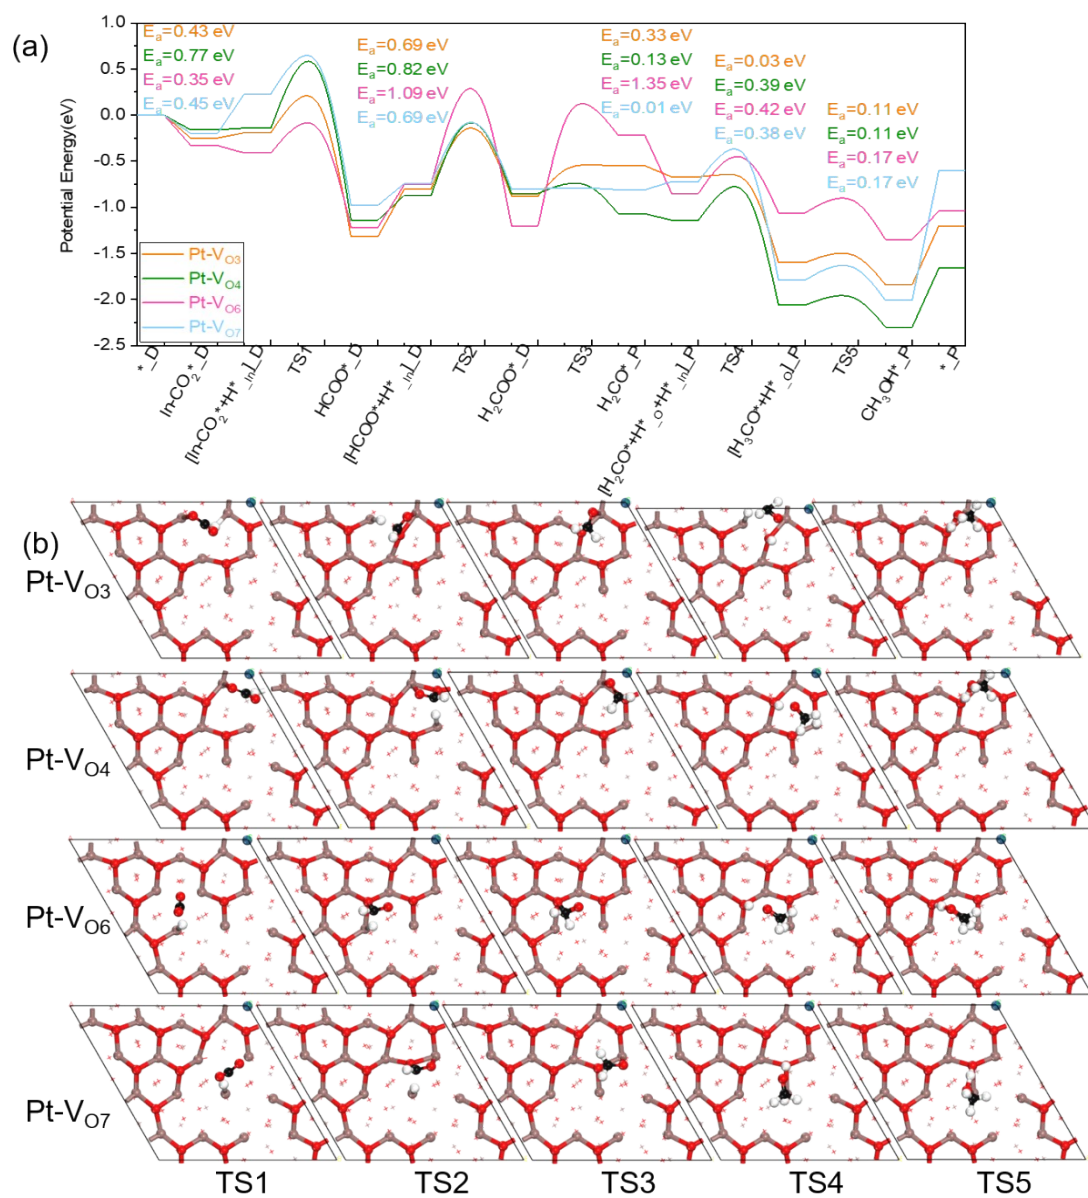

**Fig. S3** (a) Energy profiles of CO<sub>2</sub> hydrogenation to methanol on Pt/In<sub>2</sub>O<sub>3</sub> surface; (b) the structures of transition states.

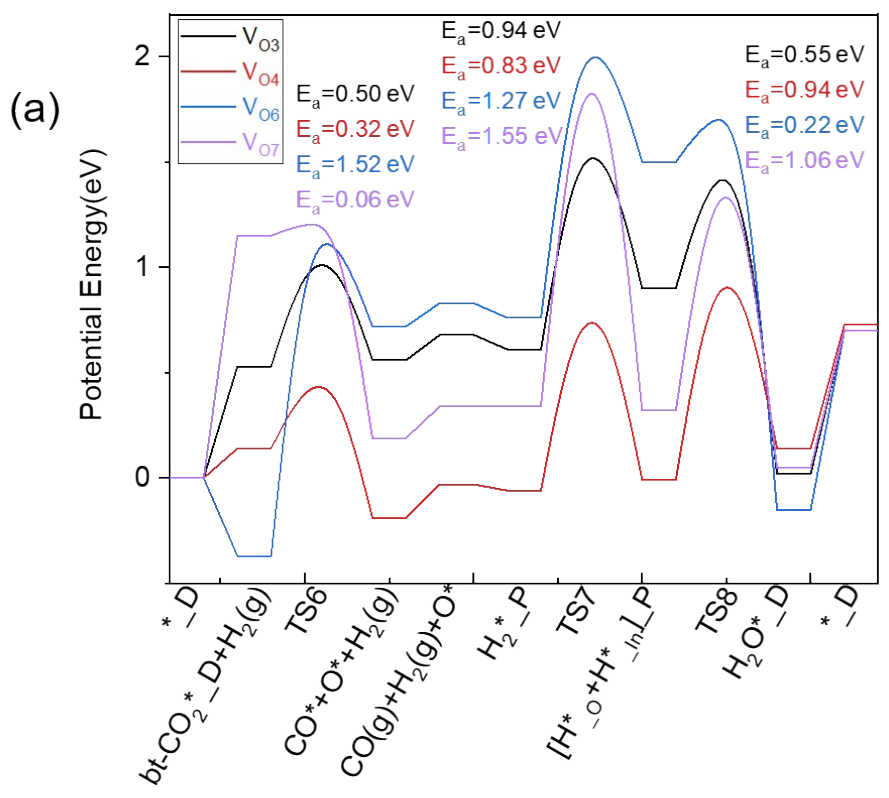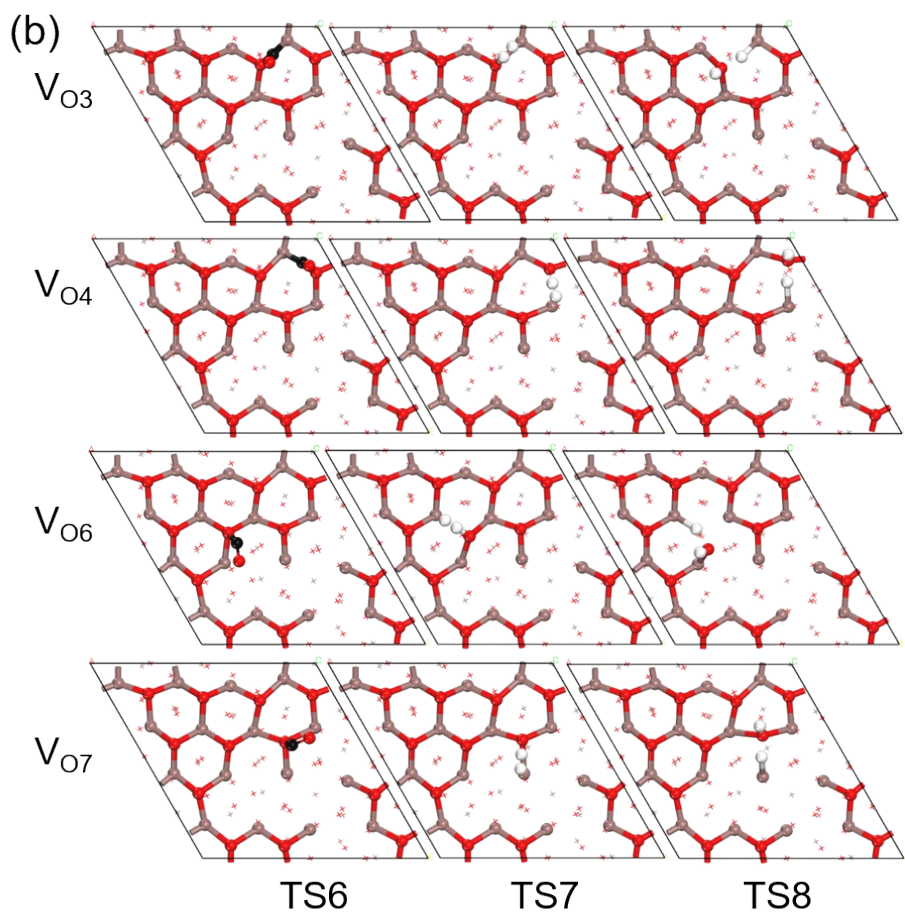

**Fig. S4** (a) Energy profiles of RWGS on  $In_2O_3$  surface; (b) the structures of transition states.



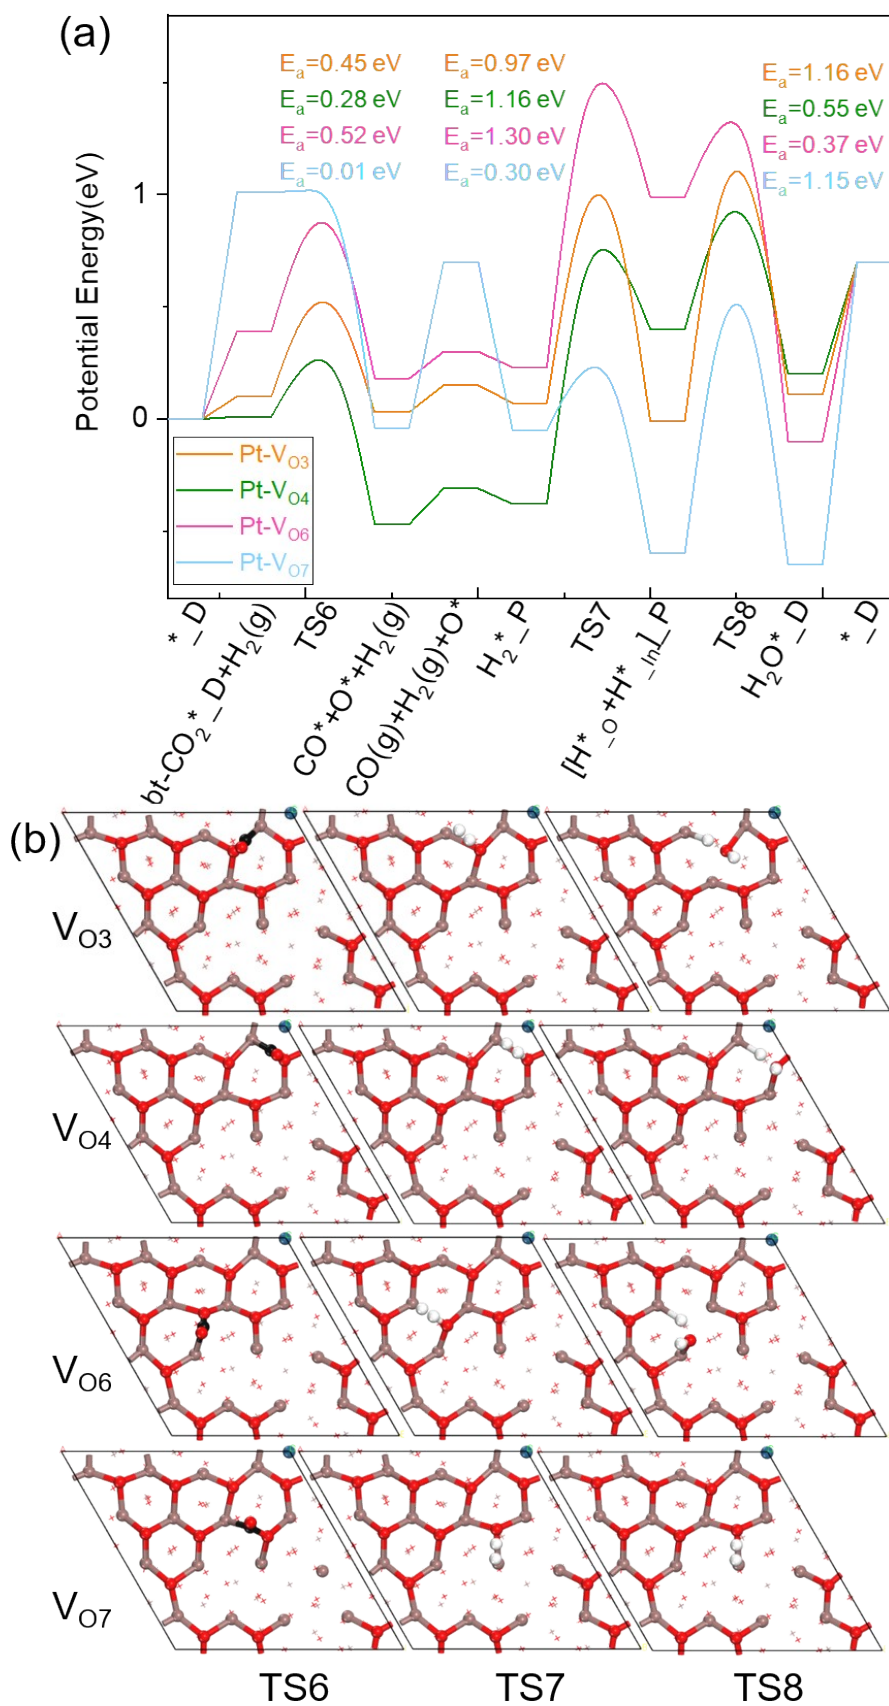

**Fig. S5** (a) Energy profiles of RWGS on Pt/In<sub>2</sub>O<sub>3</sub> surface; (b) the structures of transition states.

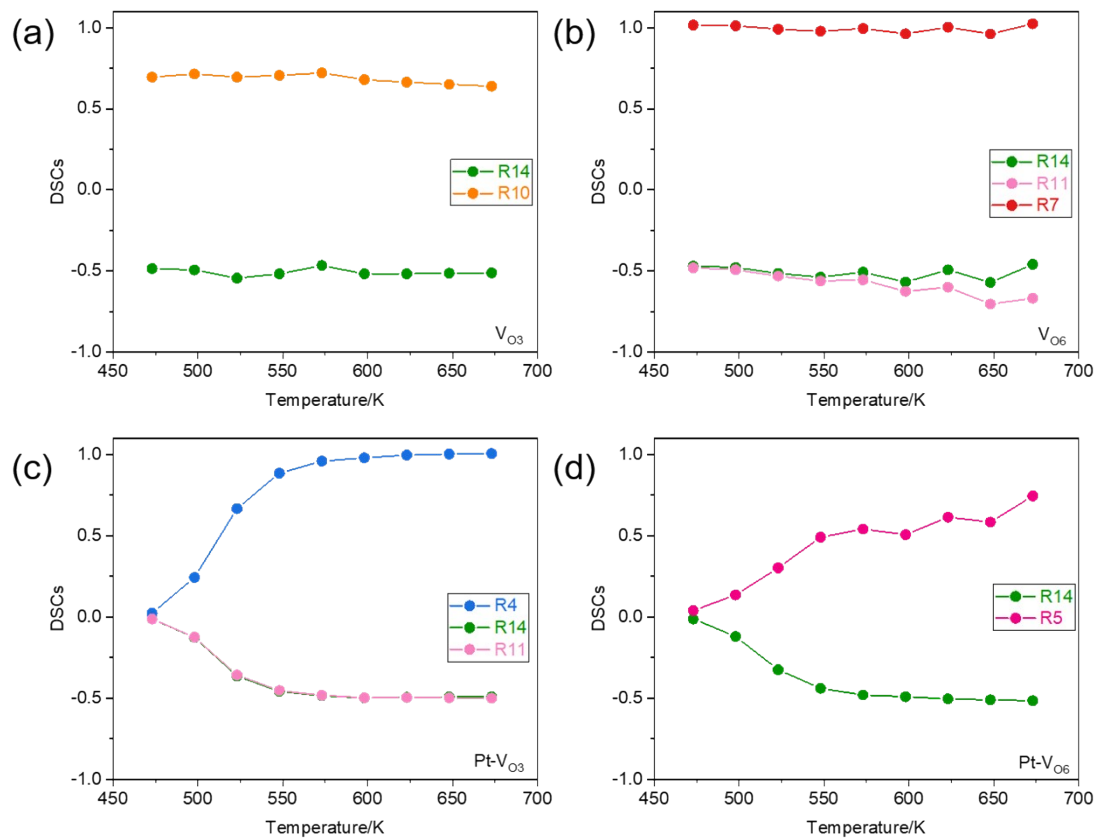

**Fig. S6** Calculated DSCs for CO<sub>2</sub> hydrogenation over the (a)  $V_{O3}$ , (b)  $V_{O6}$ , (c)  $Pt-V_{O3}$  and (d)  $Pt-V_{O6}$  sites.

**Table S1** Oxygen vacancy formation energy (unit eV).

| Surface         | In <sub>2</sub> O <sub>3</sub> | Pt <sub>bulk</sub> /In <sub>2</sub> O <sub>3</sub> | Pt <sub>surface</sub> /In <sub>2</sub> O <sub>3</sub> |
|-----------------|--------------------------------|----------------------------------------------------|-------------------------------------------------------|
| V <sub>03</sub> | 2.94                           | 3.47                                               | 3.69                                                  |
| V <sub>04</sub> | 3.65                           | 3.94                                               | 3.92                                                  |
| V <sub>06</sub> | 2.79                           | 3.32                                               | 3.18                                                  |
| V <sub>07</sub> | 3.29                           | 3.53                                               | 3.58                                                  |



**Table S2** The charges of surface In atoms on the different model surfaces (unit |e|)

|      | $\text{In}_2\text{O}_3$ | $\text{Pt}_{\text{bulk}}/\text{In}_2\text{O}_3$ | $\text{In}_2\text{O}_3\text{-V}_{\text{O3\_vac}}$ | $\text{Pt}_{\text{bulk}}\text{-V}_{\text{O3\_vac}}$ | $\text{In}_2\text{O}_3\text{-V}_{\text{O4\_vac}}$ | $\text{Pt}_{\text{bulk}}\text{-V}_{\text{O4\_vac}}$ | $\text{In}_2\text{O}_3\text{-V}_{\text{O6\_vac}}$ | $\text{Pt}_{\text{bulk}}\text{-V}_{\text{O6\_vac}}$ |
|------|-------------------------|-------------------------------------------------|---------------------------------------------------|-----------------------------------------------------|---------------------------------------------------|-----------------------------------------------------|---------------------------------------------------|-----------------------------------------------------|
| In1  | 1.79                    | 1.78                                            | 1.76                                              | 1.75                                                | 1.57                                              | 1.41                                                | 1.78                                              | 1.76                                                |
| In2  | 1.82                    | 1.82                                            | 1.81                                              | 1.81                                                | 1.81                                              | 1.81                                                | 1.81                                              | 1.81                                                |
| In3  | 1.77                    | 1.76                                            | 1.68                                              | 1.58                                                | 1.75                                              | 1.76                                                | 1.75                                              | 1.75                                                |
| In4  | 1.79                    | 1.78                                            | 1.63                                              | 1.36                                                | 1.44                                              | 1.28                                                | 1.78                                              | 1.76                                                |
| In5  | 1.77                    | 1.76                                            | 1.76                                              | 1.76                                                | 1.74                                              | 1.74                                                | 1.76                                              | 1.76                                                |
| In6  | 1.82                    | 1.82                                            | 1.79                                              | 1.80                                                | 1.82                                              | 1.81                                                | 1.72                                              | 1.70                                                |
| In7  | 1.82                    | 1.82                                            | 1.70                                              | 1.66                                                | 1.81                                              | 1.81                                                | 1.74                                              | 1.72                                                |
| In8  | 1.78                    | 1.77                                            | 1.76                                              | 1.75                                                | 1.60                                              | 1.56                                                | 1.76                                              | 1.76                                                |
| In9  | 1.82                    | 1.82                                            | 1.81                                              | 1.82                                                | 1.81                                              | 1.81                                                | 1.81                                              | 1.81                                                |
| In10 | 1.77                    | 1.75                                            | 1.75                                              | 1.75                                                | 1.76                                              | 1.76                                                | 1.61                                              | 1.42                                                |
| In11 | 1.76                    | 1.75                                            | 1.75                                              | 1.75                                                | 1.77                                              | 1.77                                                | 1.73                                              | 1.73                                                |
| In12 | 1.77                    | 1.77                                            | 1.77                                              | 1.78                                                | 1.77                                              | 1.77                                                | 1.77                                              | 1.76                                                |
| In13 | 1.79                    | 1.78                                            | 1.79                                              | 1.77                                                | 1.77                                              | 1.77                                                | 1.77                                              | 1.76                                                |
| In14 | 1.79                    | 1.78                                            | 1.78                                              | 1.78                                                | 1.77                                              | 1.78                                                | 1.78                                              | 1.76                                                |
| In15 | 1.79                    | 1.78                                            | 1.77                                              | 1.78                                                | 1.80                                              | 1.79                                                | 1.78                                              | 1.77                                                |
| In16 | 1.79                    | 1.78                                            | 1.75                                              | 1.73                                                | 1.77                                              | 1.78                                                | 1.77                                              | 1.77                                                |

**Table S3** The charges of Pt atoms on different model surfaces (unit |e|).

| Surface                           | Pt charge/e |
|-----------------------------------|-------------|
| Pt/In <sub>2</sub> O <sub>3</sub> | 1.39        |
| Pt-V <sub>03</sub>                | 1.39        |
| Pt-V <sub>04</sub>                | 1.39        |
| Pt-V <sub>06</sub>                | 1.39        |
| Pt-V <sub>07</sub>                | 1.39        |

**Table S4** The charges of Pt and oxygen vacancy formation energy in the second layer on Pt/In<sub>2</sub>O<sub>3</sub> surface.

| <b>Surface</b>                    | <b>Pt charge/e</b> | <b>V<sub>O</sub> formation energy/eV</b> |
|-----------------------------------|--------------------|------------------------------------------|
| Pt/In <sub>2</sub> O <sub>3</sub> | 1.39               |                                          |
| Pt-V <sub>O3</sub>                | 1.40               | 4.26                                     |
| Pt-V <sub>O4</sub>                | 1.39               | 3.54                                     |
| Pt-V <sub>O6</sub>                | 1.40               | 4.47                                     |
| Pt-V <sub>O7</sub>                | 1.39               | 3.77                                     |

**Table S5** Elementary reactions considered in microkinetic simulations of CO<sub>2</sub> hydrogenation to methanol and CO on the In<sub>2</sub>O<sub>3</sub> and Pt/In<sub>2</sub>O<sub>3</sub> model surfaces.

| Step | Elementary reaction <sup>a</sup>                                                                                                                                    |
|------|---------------------------------------------------------------------------------------------------------------------------------------------------------------------|
| R1   | CO <sub>2_g</sub> + * <sub>s</sub> <-> CO <sub>2_s</sub> #ln-CO <sub>2</sub>                                                                                        |
| R2   | CO <sub>2_g</sub> + * <sub>s</sub> <-> O <sub>2</sub> C <sub>s</sub> #bt-CO <sub>2</sub>                                                                            |
| R3   | CO <sub>2_s</sub> + H <sub>h</sub> <-> [CO <sub>2</sub> -H <sub>s</sub> ] + * <sub>h</sub> <-> HCOO <sub>s</sub> + * <sub>h</sub>                                   |
| R4   | HCOO <sub>s</sub> + H <sub>h</sub> <-> [HCOO-H <sub>s</sub> ] + * <sub>h</sub> <-> H <sub>2</sub> COO <sub>s</sub> + * <sub>h</sub>                                 |
| R5   | H <sub>2</sub> COO <sub>s</sub> <-> [H <sub>2</sub> CO-O <sub>s</sub> ] <-> OH <sub>2</sub> CO <sub>s</sub>                                                         |
| R6   | OH <sub>2</sub> CO <sub>s</sub> + 2H <sub>h</sub> <-> [OH <sub>2</sub> CO-H <sub>s</sub> ] + 2* <sub>h</sub> <-> OH <sub>3</sub> COH <sub>s</sub> + 2* <sub>h</sub> |
| R7   | OH <sub>3</sub> COH <sub>s</sub> <-> [OH <sub>3</sub> CO-H <sub>s</sub> ] <-> OCH <sub>3</sub> OH <sub>s</sub>                                                      |
| R8   | OCH <sub>3</sub> OH <sub>s</sub> <-> CH <sub>3</sub> OH <sub>g</sub> + O <sub>s</sub>                                                                               |
| R9   | H <sub>2_g</sub> + 2* <sub>h</sub> <-> [H-H <sub>h</sub> ] + * <sub>h</sub> <-> 2H <sub>h</sub>                                                                     |
| R10  | H <sub>2_g</sub> + O <sub>s</sub> + * <sub>h</sub> <-> [OH-H <sub>s</sub> ] + * <sub>h</sub> <-> OH <sub>s</sub> + H <sub>h</sub>                                   |
| R11  | OH <sub>s</sub> + H <sub>h</sub> <-> [H-OH <sub>s</sub> ] + * <sub>h</sub> <-> H <sub>2</sub> O <sub>s</sub> + * <sub>h</sub>                                       |
| R12  | H <sub>2</sub> O <sub>s</sub> <-> H <sub>2</sub> O <sub>g</sub> + * <sub>s</sub>                                                                                    |
| R13  | O <sub>s</sub> + H <sub>h</sub> <-> OH <sub>s</sub> + * <sub>h</sub>                                                                                                |
| R14  | CO <sub>2_s</sub> + * <sub>s</sub> <-> [CO-O <sub>s</sub> ] + * <sub>s</sub> <-> CO <sub>s</sub> + O <sub>s</sub>                                                   |
| R15  | CO <sub>s</sub> <-> CO <sub>g</sub> + * <sub>s</sub>                                                                                                                |
| R16  | CH <sub>3</sub> OH <sub>s</sub> <-> CH <sub>3</sub> OH <sub>g</sub> + * <sub>s</sub>                                                                                |

<sup>a</sup> “\_s” and “\_h” denote the V<sub>0</sub> and “hydrogen reservoir” sites, respectively, “\_g” indicates gaseous species, and “#” marks the beginning of a comment.

**Table S6** The virtual frequencies of the transition state (unit  $\text{cm}^{-1}$ ).

|            | $V_{O3}$    | $V_{O4}$    | $V_{O6}$    | $V_{O7}$    | Pt- $V_{O3}$ | Pt- $V_{O4}$ | Pt- $V_{O6}$ | Pt- $V_{O7}$ |
|------------|-------------|-------------|-------------|-------------|--------------|--------------|--------------|--------------|
| <b>TS1</b> | 507.622018  | 384.025355  | 471.601818  | 491.682074  | 546.214602   | 537.117569   | 485.787749   | 494.249525   |
| <b>TS2</b> | 678.624361  | 592.712775  | 425.916740  | 641.802480  | 658.817131   | 625.541431   | 327.996085   | 651.189068   |
| <b>TS3</b> | 132.178428  | 151.448666  | 205.630970  | 189.641724  | 166.846031   | 160.151975   | 152.635671   | 134.667258   |
| <b>TS4</b> | 623.965920  | 642.999521  | 645.174059  | 682.466773  | 687.586652   | 635.702798   | 497.513579   | 519.729332   |
| <b>TS5</b> | 873.420659  | 893.259330  | 824.667898  | 773.693810  | 876.120216   | 878.122224   | 891.972661   | 792.245212   |
| <b>TS6</b> | 286.730982  | 267.095856  | 338.461100  | 305.035048  | 277.372344   | 265.304315   | 258.468454   | 235.503163   |
| <b>TS7</b> | 1292.470726 | 1162.661706 | 1165.181547 | 1344.525913 | 1243.164570  | 1263.054841  | 1140.309221  | 1289.415226  |
| <b>TS8</b> | 803.972372  | 1093.456021 | 774.875807  | 1245.060667 | 1201.703821  | 1054.519419  | 1078.606472  | 1243.305195  |

**Table S7** Optimized fractional coordinates of the catalyst model with  $V_{O_3}$ .

| In                  | O                   |                     |   |   |   |
|---------------------|---------------------|---------------------|---|---|---|
| 1.000000000000000   |                     |                     |   |   |   |
| 12.5091307398836005 | -7.2221500000000001 | 0.000000000000000   |   |   |   |
| 0.000000000000000   | 14.4443000000000001 | -0.0000000000000248 |   |   |   |
| 0.000000000000000   | 0.000000000000000   | 17.985499999999983  |   |   |   |
| In                  | O                   |                     |   |   |   |
| 48                  | 71                  |                     |   |   |   |
| Selective dynamics  |                     |                     |   |   |   |
| Direct              |                     |                     |   |   |   |
| 0.8515799999999984  | 0.4089299999999980  | 0.3472999999999971  | F | F | F |
| 0.5142682570873042  | 0.7420955417439535  | 0.5097115493849164  | T | T | T |
| 0.1564310591981121  | 0.0619650681266626  | 0.6867291437387396  | T | T | T |
| 0.8290999999999968  | 0.9356200000000001  | 0.3251800000000031  | F | F | F |
| 0.4934263782731753  | 0.2647624177770678  | 0.4980236421982138  | T | T | T |
| 0.1598075603830452  | 0.6029805369746450  | 0.6604123466815101  | T | T | T |
| 0.3248900000000035  | 0.4314099999999996  | 0.3251800000000031  | F | F | F |
| 0.9941862097263033  | 0.7649322081700838  | 0.4957910548637989  | T | T | T |
| 0.6637471858895150  | 0.0977119024730455  | 0.6694825533627705  | T | T | T |
| 0.8403399999999976  | 0.6722699999999975  | 0.3362400000000036  | F | F | F |
| 0.5080633114406575  | 0.0050526634280900  | 0.5042654014448330  | T | T | T |
| 0.1743944841278614  | 0.3323585563846980  | 0.6708660145556480  | T | T | T |
| 0.1065200000000033  | 0.6835200000000015  | 0.3251800000000031  | F | F | F |
| 0.7764462658458294  | 0.0141229365317010  | 0.4943424943392161  | T | T | T |
| 0.4528704726178415  | 0.3611599703836351  | 0.6607896978150951  | T | T | T |
| 0.5994799999999998  | 0.4426500000000004  | 0.3472999999999971  | F | F | F |
| 0.2668381842963090  | 0.7784373977054264  | 0.5112277605802050  | T | T | T |
| 0.9265903683195437  | 0.1034567219048912  | 0.6861588852676462  | T | T | T |
| 0.0952800000000025  | 0.4426500000000004  | 0.3472999999999971  | F | F | F |
| 0.7645660104151422  | 0.7740523137405820  | 0.5162507787874046  | T | T | T |
| 0.4426507307357744  | 0.1062337190469328  | 0.6853224682451556  | T | T | T |
| 0.0727899999999977  | 0.9018900000000016  | 0.3251800000000031  | F | F | F |
| 0.7435530794345807  | 0.2318573783848827  | 0.4984283785640387  | T | T | T |
| 0.4049885478387517  | 0.5592587262648488  | 0.6585920958852827  | T | T | T |
| 0.5657599999999974  | 0.6610299999999967  | 0.3472999999999971  | F | F | F |
| 0.2304054538820196  | 0.9933968923129922  | 0.5096228067652528  | T | T | T |
| 0.8940806670016154  | 0.3237114623743447  | 0.6801217489888898  | T | T | T |
| 0.8403399999999976  | 0.1680700000000002  | 0.3362399999999965  | F | F | F |
| 0.5041570696969010  | 0.5041016929848836  | 0.5014244451321177  | T | T | T |
| 0.1654156318653565  | 0.8353152135021066  | 0.6797503381862267  | T | T | T |
| 0.5657599999999974  | 0.1568299999999994  | 0.3472999999999971  | F | F | F |
| 0.2313903904868609  | 0.4946340799701576  | 0.5094477168411156  | T | T | T |
| 0.8958311958902627  | 0.8212158193387114  | 0.6845148625737418  | T | T | T |
| 0.1065200000000033  | 0.1793100000000010  | 0.3251800000000031  | F | F | F |



|                    |                    |                    |   |   |   |
|--------------------|--------------------|--------------------|---|---|---|
| 0.7779706781735610 | 0.5137489079531519 | 0.4980932425311955 | T | T | T |
| 0.4494037933933415 | 0.8474258800575661 | 0.6593408309589031 | T | T | T |
| 0.5769999999999982 | 0.9018900000000016 | 0.3251800000000031 | F | F | F |
| 0.2439226698903886 | 0.2338835054590366 | 0.4929666415974561 | T | T | T |
| 0.9111505034229292 | 0.5637270969466506 | 0.6725739149189714 | T | T | T |
| 0.3473800000000011 | 0.9131300000000024 | 0.3472999999999971 | F | F | F |
| 0.0147427264191878 | 0.2441067228509736 | 0.5182159548126933 | T | T | T |
| 0.6869476198313471 | 0.5725395162454751 | 0.6782274304042798 | T | T | T |
| 0.3361400000000003 | 0.1680700000000002 | 0.3362399999999965 | F | F | F |
| 0.0036978252712178 | 0.5057841734188595 | 0.5053496313696628 | T | T | T |
| 0.6756054020319999 | 0.8446885490620089 | 0.6710175424621908 | T | T | T |
| 0.3361400000000003 | 0.6722699999999975 | 0.3362400000000036 | F | F | F |
| 0.0027136056074737 | 0.0031581159661013 | 0.5060566629704887 | T | T | T |
| 0.6743038041730329 | 0.3376855809375013 | 0.6914469027532265 | T | T | T |
| 0.2541799999999981 | 0.7461800000000025 | 0.3944800000000015 | F | F | F |
| 0.9227930716555732 | 0.0772303708879703 | 0.5668314145296608 | T | T | T |
| 0.5920773102448843 | 0.4193083059146139 | 0.7315133224601447 | T | T | T |
| 0.0094700000000003 | 0.5311999999999983 | 0.3799399999999977 | F | F | F |
| 0.6754789547819191 | 0.8611149310606409 | 0.5497876299528094 | T | T | T |
| 0.9439199999999985 | 0.1009499999999974 | 0.3071899999999985 | F | F | F |
| 0.6087473539822360 | 0.4353245646869809 | 0.4741549136225502 | T | T | T |
| 0.2828488433157851 | 0.7777742298590264 | 0.6632727959756127 | T | T | T |
| 0.9074600000000004 | 0.8429700000000011 | 0.3071899999999985 | F | F | F |
| 0.5728093441896341 | 0.1767605890445637 | 0.4753803538166425 | T | T | T |
| 0.2346989883807196 | 0.5095556093001503 | 0.6662063556704301 | T | T | T |
| 0.5217299999999980 | 0.9989399999999975 | 0.3799399999999977 | F | F | F |
| 0.1912846587082319 | 0.3332115359321190 | 0.5498833533203544 | T | T | T |
| 0.8487125828280064 | 0.6618269518472530 | 0.7166944972864097 | T | T | T |
| 0.4100400000000022 | 0.8281300000000016 | 0.2779999999999987 | F | F | F |
| 0.0792531125154843 | 0.1590567919286212 | 0.4489968940192326 | T | T | T |
| 0.7470686529399271 | 0.4850153060022834 | 0.6149036487996805 | T | T | T |
| 0.3978899999999967 | 0.0618100000000013 | 0.3019099999999995 | F | F | F |
| 0.0633898156816192 | 0.4004775800589737 | 0.4727799778597759 | T | T | T |
| 0.7269065853254221 | 0.7315955072164372 | 0.6399715094453625 | T | T | T |
| 0.0083500000000001 | 0.7340200000000010 | 0.3705700000000007 | F | F | F |
| 0.6717070398398745 | 0.0640657231655175 | 0.5400812992660794 | T | T | T |
| 0.3372236691002396 | 0.3957260537346831 | 0.7027892384469715 | T | T | T |
| 0.7367599999999968 | 0.2351799999999997 | 0.3652900000000017 | F | F | F |
| 0.3978843580966602 | 0.5728329506410630 | 0.5371217328396172 | T | T | T |
| 0.0610967703395418 | 0.8984652544188895 | 0.7104790241528705 | T | T | T |
| 0.6723300000000023 | 0.6105200000000011 | 0.3019099999999995 | F | F | F |
| 0.3416211580826519 | 0.9467262577226331 | 0.4734429207149943 | T | T | T |
| 0.0107051606769708 | 0.2794192012110717 | 0.6416750386726822 | T | T | T |
| 0.7340799999999987 | 0.0000599999999977 | 0.3705700000000007 | F | F | F |

|                    |                    |                    |   |   |   |
|--------------------|--------------------|--------------------|---|---|---|
| 0.3997649501527706 | 0.3403331764339358 | 0.5378346029363211 | T | T | T |
| 0.0726869763819414 | 0.6713453543226611 | 0.7078255589904238 | T | T | T |
| 0.4919900000000013 | 0.7542299999999997 | 0.3944800000000015 | F | F | F |
| 0.1635609412787195 | 0.0819776209181657 | 0.5677576331803551 | T | T | T |
| 0.8344116841445477 | 0.4142325782932820 | 0.7359136158778188 | T | T | T |
| 0.5068300000000008 | 0.2716500000000011 | 0.3652900000000017 | F | F | F |
| 0.1799520602806199 | 0.6116681722421624 | 0.5385647420827598 | T | T | T |
| 0.8414551551772345 | 0.9339957121655086 | 0.7094908179141214 | T | T | T |
| 0.1654399999999967 | 0.0644899999999993 | 0.3071899999999985 | F | F | F |
| 0.8335829925911383 | 0.3993674088838328 | 0.4738508971007273 | T | T | T |
| 0.4988599223337213 | 0.7258780669237144 | 0.6624509906872558 | T | T | T |
| 0.9465999999999966 | 0.3360800000000026 | 0.3019099999999995 | F | F | F |
| 0.6088080830595397 | 0.6691815422421276 | 0.4707238014919020 | T | T | T |
| 0.2773308082812859 | 0.0150867201090846 | 0.6874200436111071 | T | T | T |
| 0.6627999999999972 | 0.8133499999999998 | 0.2925400000000025 | F | F | F |
| 0.3288950208065489 | 0.1462128483584799 | 0.4596093220907049 | T | T | T |
| 0.9963066666742727 | 0.4769320878471813 | 0.6267514505925340 | T | T | T |
| 0.2622300000000024 | 0.5164199999999965 | 0.3944800000000015 | F | F | F |
| 0.9300864926195578 | 0.8480496470357484 | 0.5656188117089808 | T | T | T |
| 0.5920445540533085 | 0.1760215839705467 | 0.7361016613344079 | T | T | T |
| 0.4772099999999995 | 0.4866799999999998 | 0.3799399999999977 | F | F | F |
| 0.1533757410846848 | 0.8302041110770222 | 0.5570174385861383 | T | T | T |
| 0.8209078184924556 | 0.1582086129807940 | 0.7170175787343401 | T | T | T |
| 0.4180899999999994 | 0.5983700000000027 | 0.2779999999999987 | F | F | F |
| 0.0827782380941788 | 0.9281092777762060 | 0.4471103227710235 | T | T | T |
| 0.7450977650087568 | 0.2602045428739378 | 0.6159171390885980 | T | T | T |
| 0.2743899999999968 | 0.2743299999999991 | 0.3705700000000007 | F | F | F |
| 0.9470374371006915 | 0.6122234284223596 | 0.5415173504430203 | T | T | T |
| 0.6063091077884474 | 0.9367376532554488 | 0.7049930654820754 | T | T | T |
| 0.1802800000000033 | 0.5903199999999984 | 0.2779999999999987 | F | F | F |
| 0.8487029624416181 | 0.9225034987316296 | 0.4472587726986946 | T | T | T |
| 0.4961002439765903 | 0.2477345313332169 | 0.6204359268086215 | T | T | T |
| 0.1505500000000026 | 0.3456100000000006 | 0.2925400000000025 | F | F | F |
| 0.8213404168615087 | 0.6781379891212236 | 0.4603595362027573 | T | T | T |
| 0.4862799410593152 | 0.0099877885677162 | 0.6250770581169891 | T | T | T |
| 0.1950599999999980 | 0.8578600000000023 | 0.2925400000000025 | F | F | F |
| 0.8641819886277291 | 0.1867494069605935 | 0.4600091388615598 | T | T | T |
| 0.5344723294458629 | 0.5265750365008622 | 0.6234123442351741 | T | T | T |
| 0.7732299999999981 | 0.5015799999999970 | 0.3652900000000017 | F | F | F |
| 0.4354420492524970 | 0.8296418800845834 | 0.5371304428957596 | T | T | T |
| 0.0973050224714412 | 0.1647883384003139 | 0.7120162757617871 | T | T | T |

**Table S8** Optimized fractional coordinates of the catalyst model with V<sub>O4</sub>.

| In                 | O                  |                     |                     |                     |   |
|--------------------|--------------------|---------------------|---------------------|---------------------|---|
|                    |                    | 1.000000000000000   |                     |                     |   |
|                    |                    | 12.5091307398836005 | -7.2221500000000001 | 0.0000000000000000  |   |
|                    |                    | 0.0000000000000000  | 14.4443000000000001 | -0.0000000000000248 |   |
|                    |                    | 0.0000000000000000  | 0.0000000000000000  | 17.985499999999983  |   |
| In                 | O                  |                     |                     |                     |   |
| 48                 | 71                 |                     |                     |                     |   |
| Selective dynamics |                    |                     |                     |                     |   |
| Direct             |                    |                     |                     |                     |   |
| 0.8515799999999984 | 0.4089299999999980 | 0.3473000000000042  | F                   | F                   | F |
| 0.5149990233166554 | 0.7428080616530326 | 0.5098463272641417  | T                   | T                   | T |
| 0.1843580666382897 | 0.0737361649397346 | 0.6841553569050361  | T                   | T                   | T |
| 0.8290999999999968 | 0.9356200000000001 | 0.3251800000000031  | F                   | F                   | F |
| 0.4941053251862303 | 0.2665901826037373 | 0.4984375370250552  | T                   | T                   | T |
| 0.1586688486545680 | 0.6038946087059446 | 0.6577924345387669  | T                   | T                   | T |
| 0.3248900000000035 | 0.4314099999999996 | 0.3251800000000031  | F                   | F                   | F |
| 0.9937069362565175 | 0.7638609187479671 | 0.4941975130876368  | T                   | T                   | T |
| 0.6554651179892720 | 0.0991562959366657 | 0.6705560414569639  | T                   | T                   | T |
| 0.8403399999999976 | 0.6722699999999975 | 0.3362400000000036  | F                   | F                   | F |
| 0.5061131804296303 | 0.0064690718175148 | 0.5048205912313559  | T                   | T                   | T |
| 0.1836748820721856 | 0.3494679533258775 | 0.6708915091027603  | T                   | T                   | T |
| 0.1065200000000033 | 0.6835200000000015 | 0.3251800000000031  | F                   | F                   | F |
| 0.7749604247800389 | 0.0141661932494103 | 0.4941893757017904  | T                   | T                   | T |
| 0.4457243211424951 | 0.3503163129893044 | 0.6703378860914831  | T                   | T                   | T |
| 0.5994799999999998 | 0.4426500000000004 | 0.3473000000000042  | F                   | F                   | F |
| 0.2671128295858441 | 0.7778910962178234 | 0.5099900579425301  | T                   | T                   | T |
| 0.9140881528563943 | 0.0974694281200542 | 0.6862199287253025  | T                   | T                   | T |
| 0.0952800000000025 | 0.4426500000000004 | 0.3473000000000042  | F                   | F                   | F |
| 0.7646581914807949 | 0.7738317653950539 | 0.5174305133816433  | T                   | T                   | T |
| 0.4355061524542749 | 0.1169083285723086 | 0.6798550077184921  | T                   | T                   | T |
| 0.0727899999999977 | 0.9018900000000016 | 0.3251800000000031  | F                   | F                   | F |
| 0.7421399767786604 | 0.2313462963694210 | 0.4991018385352823  | T                   | T                   | T |
| 0.4117081285993067 | 0.5633682317243957 | 0.6574447774837775  | T                   | T                   | T |
| 0.5657599999999974 | 0.6610299999999967 | 0.3473000000000042  | F                   | F                   | F |
| 0.2334209904941849 | 0.9937172363410687 | 0.5169532849338699  | T                   | T                   | T |
| 0.8920885801496300 | 0.3223419979823625 | 0.6827482234255083  | T                   | T                   | T |
| 0.8403399999999976 | 0.1680700000000002 | 0.3362399999999965  | F                   | F                   | F |
| 0.5036616759138343 | 0.5023785950291298 | 0.5033157679099141  | T                   | T                   | T |
| 0.1623622679549648 | 0.8320262595633152 | 0.6709406495604809  | T                   | T                   | T |
| 0.5657599999999974 | 0.1568299999999994 | 0.3473000000000042  | F                   | F                   | F |
| 0.2320483145526137 | 0.4967127364608228 | 0.5096734265298722  | T                   | T                   | T |
| 0.9026866371871530 | 0.8253446072291560 | 0.6851994533391705  | T                   | T                   | T |
| 0.1065200000000033 | 0.1793100000000010 | 0.3251800000000031  | F                   | F                   | F |

|                    |                    |                    |   |   |   |
|--------------------|--------------------|--------------------|---|---|---|
| 0.7770372891821231 | 0.5133767733269278 | 0.4985703244176635 | T | T | T |
| 0.4488434666728597 | 0.8511451480224920 | 0.6582374115691593 | T | T | T |
| 0.5769999999999982 | 0.9018900000000016 | 0.3251800000000031 | F | F | F |
| 0.2441398677751724 | 0.2337011283319960 | 0.4937472461584972 | T | T | T |
| 0.9088928795977106 | 0.5626442752468587 | 0.6713133212153211 | T | T | T |
| 0.3473800000000011 | 0.9131300000000024 | 0.3473000000000042 | F | F | F |
| 0.0155955798532133 | 0.2426119925012491 | 0.5156995030559189 | T | T | T |
| 0.6858960681932245 | 0.5729895144685381 | 0.6795539832735090 | T | T | T |
| 0.3361400000000003 | 0.1680700000000002 | 0.3362399999999965 | F | F | F |
| 0.0018756940273994 | 0.5039036946695492 | 0.5052497136478931 | T | T | T |
| 0.6737219161310161 | 0.8437886003191407 | 0.6711746347952220 | T | T | T |
| 0.3361400000000003 | 0.6722699999999975 | 0.3362400000000036 | F | F | F |
| 0.0036591805502722 | 0.0032315325347718 | 0.5062618756476039 | T | T | T |
| 0.6712076204386068 | 0.3379939509365142 | 0.6897718930499546 | T | T | T |
| 0.2541799999999981 | 0.7461800000000025 | 0.3944800000000015 | F | F | F |
| 0.9226348478598790 | 0.0810032806262124 | 0.5671832842509296 | T | T | T |
| 0.5939463633284054 | 0.4226488517257991 | 0.7343359487899489 | T | T | T |
| 0.0094700000000003 | 0.5311999999999983 | 0.3799399999999977 | F | F | F |
| 0.6764931492906964 | 0.8617903954013848 | 0.5499099138131547 | T | T | T |
| 0.3414580067670765 | 0.1902069573066768 | 0.7161492868785984 | T | T | T |
| 0.9439199999999985 | 0.1009499999999974 | 0.3071899999999985 | F | F | F |
| 0.6090246637341016 | 0.4365401924878508 | 0.4724910441420572 | T | T | T |
| 0.2817459744485556 | 0.7761385738230853 | 0.6607177925444565 | T | T | T |
| 0.9074600000000004 | 0.8429700000000011 | 0.3071899999999985 | F | F | F |
| 0.5726889869481916 | 0.1772302027336016 | 0.4732578586500206 | T | T | T |
| 0.2397596326426580 | 0.5181390123899720 | 0.6594690131756259 | T | T | T |
| 0.5217299999999980 | 0.9989399999999975 | 0.3799399999999977 | F | F | F |
| 0.1878374522746549 | 0.3336640838725558 | 0.5506067085420190 | T | T | T |
| 0.8511804729324217 | 0.6651000050865498 | 0.7158118918453577 | T | T | T |
| 0.4100400000000022 | 0.8281300000000016 | 0.2779999999999987 | F | F | F |
| 0.0789235329400360 | 0.1596789490094486 | 0.4476081577392707 | T | T | T |
| 0.7475798642318706 | 0.4878006342046997 | 0.6150704686288698 | T | T | T |
| 0.3978899999999967 | 0.0618100000000013 | 0.3019099999999995 | F | F | F |
| 0.0624200451937423 | 0.3990730362767277 | 0.4729942111324351 | T | T | T |
| 0.7274430882000924 | 0.7329225563094782 | 0.6410094437114989 | T | T | T |
| 0.0083500000000001 | 0.7340200000000010 | 0.3705700000000007 | F | F | F |
| 0.6698819485335642 | 0.0637639859557397 | 0.5389460110920550 | T | T | T |
| 0.3394222244229990 | 0.4066747317184655 | 0.7070070320750419 | T | T | T |
| 0.7367599999999968 | 0.2351799999999997 | 0.3652900000000017 | F | F | F |
| 0.3990551682358240 | 0.5733466176307767 | 0.5359517210202084 | T | T | T |
| 0.0723974350480446 | 0.9080510993692298 | 0.7101741403014246 | T | T | T |
| 0.6723300000000023 | 0.6105200000000011 | 0.3019099999999995 | F | F | F |
| 0.3410253263195972 | 0.9458645374374500 | 0.4722008470488638 | T | T | T |
| 0.0177133245469693 | 0.2693616537809603 | 0.6624761767803953 | T | T | T |

|                    |                    |                    |   |   |   |
|--------------------|--------------------|--------------------|---|---|---|
| 0.7340799999999987 | 0.0000599999999977 | 0.3705700000000007 | F | F | F |
| 0.3974593906023621 | 0.3390016083497778 | 0.5395158702320482 | T | T | T |
| 0.0706325721066450 | 0.6702751965808893 | 0.7046118127850254 | T | T | T |
| 0.4919900000000013 | 0.7542299999999997 | 0.3944800000000015 | F | F | F |
| 0.1582981819462456 | 0.0887257804104741 | 0.5676250862531925 | T | T | T |
| 0.8330367850517658 | 0.4148282323452948 | 0.7352280291482206 | T | T | T |
| 0.5068300000000008 | 0.2716500000000011 | 0.3652900000000017 | F | F | F |
| 0.1774282231287453 | 0.6105887627555564 | 0.5362075708188521 | T | T | T |
| 0.8409331035903725 | 0.9327013693142870 | 0.7115982412694291 | T | T | T |
| 0.1654399999999967 | 0.0644899999999993 | 0.3071899999999985 | F | F | F |
| 0.8321587179869120 | 0.3984320583782845 | 0.4730225898014767 | T | T | T |
| 0.4994735511452422 | 0.7288731005650684 | 0.6600801498161354 | T | T | T |
| 0.9465999999999966 | 0.3360800000000026 | 0.3019099999999995 | F | F | F |
| 0.6089150475005091 | 0.6687307783754296 | 0.4712544050414884 | T | T | T |
| 0.2754552466687241 | 0.9980533123478725 | 0.6403975923942706 | T | T | T |
| 0.6627999999999972 | 0.8133499999999998 | 0.2925400000000025 | F | F | F |
| 0.3288265672073034 | 0.1453051171166040 | 0.4604529480077387 | T | T | T |
| 0.9971378136089177 | 0.4707678121899500 | 0.6263710576071274 | T | T | T |
| 0.2622300000000024 | 0.5164199999999965 | 0.3944800000000015 | F | F | F |
| 0.9304866299310866 | 0.8478980175843058 | 0.5661171460898767 | T | T | T |
| 0.5851991778864267 | 0.1767145284897717 | 0.7349603012165379 | T | T | T |
| 0.4772099999999995 | 0.4866799999999998 | 0.3799399999999977 | F | F | F |
| 0.1466906737622366 | 0.8181752028990663 | 0.5497473629443860 | T | T | T |
| 0.8133174195426405 | 0.1563977857427856 | 0.7159632578219376 | T | T | T |
| 0.4180899999999994 | 0.5983700000000027 | 0.2779999999999987 | F | F | F |
| 0.0853035767677959 | 0.9298321443831534 | 0.4484221628134067 | T | T | T |
| 0.7466092023660805 | 0.2613999610254240 | 0.6155995663302544 | T | T | T |
| 0.2743899999999968 | 0.2743299999999991 | 0.3705700000000007 | F | F | F |
| 0.9448379139814714 | 0.6091547689169616 | 0.5411916335191426 | T | T | T |
| 0.6055322718173781 | 0.9375550796318572 | 0.7043386872032661 | T | T | T |
| 0.1802800000000033 | 0.5903199999999984 | 0.2779999999999987 | F | F | F |
| 0.8492109940693141 | 0.9234267780651133 | 0.4479637109148874 | T | T | T |
| 0.5188309207211310 | 0.2628966930803271 | 0.6150509876143280 | T | T | T |
| 0.1505500000000026 | 0.3456100000000006 | 0.2925400000000025 | F | F | F |
| 0.8215553440224140 | 0.6785143180034984 | 0.4599791516553160 | T | T | T |
| 0.4858328623081304 | 0.0143661749991254 | 0.6256972598644751 | T | T | T |
| 0.1950599999999980 | 0.8578600000000023 | 0.2925400000000025 | F | F | F |
| 0.8637215601854377 | 0.1868742949277953 | 0.4596942530072318 | T | T | T |
| 0.5326219970597968 | 0.5218189499994355 | 0.6245796364587243 | T | T | T |
| 0.7732299999999981 | 0.5015799999999970 | 0.3652900000000017 | F | F | F |
| 0.4359386795058534 | 0.8306580213089910 | 0.5365753656436388 | T | T | T |

**Table S9** Optimized fractional coordinates of the catalyst model with V<sub>O6</sub>.

|                    |                    |                     |                    |                     |   |
|--------------------|--------------------|---------------------|--------------------|---------------------|---|
| In                 | O                  |                     |                    |                     |   |
|                    |                    | 1.000000000000000   |                    |                     |   |
|                    |                    | 12.5091307398836005 | -7.222150000000001 | 0.000000000000000   |   |
|                    |                    | 0.000000000000000   | 14.444300000000001 | -0.0000000000000248 |   |
|                    |                    | 0.000000000000000   | 0.000000000000000  | 17.985499999999983  |   |
| In                 | O                  |                     |                    |                     |   |
|                    |                    | 48                  | 71                 |                     |   |
| Selective dynamics |                    |                     |                    |                     |   |
| Direct             |                    |                     |                    |                     |   |
| 0.8515799999999984 | 0.4089299999999980 | 0.3473000000000042  | F                  | F                   | F |
| 0.5141925532925935 | 0.7419197013384988 | 0.5103325193101471  | T                  | T                   | T |
| 0.1781414921780414 | 0.0781005712950788 | 0.6851584716138206  | T                  | T                   | T |
| 0.8290999999999968 | 0.9356200000000001 | 0.3251800000000031  | F                  | F                   | F |
| 0.4948275495046375 | 0.2663115399191428 | 0.4960542910140632  | T                  | T                   | T |
| 0.1589140886350291 | 0.6043299831125067 | 0.6585566859134935  | T                  | T                   | T |
| 0.3248900000000035 | 0.4314099999999996 | 0.3251800000000031  | F                  | F                   | F |
| 0.9941659006168786 | 0.7645410725262597 | 0.4938754831205310  | T                  | T                   | T |
| 0.6604135309536290 | 0.0967734422418557 | 0.6697262652730297  | T                  | T                   | T |
| 0.8403399999999976 | 0.6722699999999975 | 0.3362400000000036  | F                  | F                   | F |
| 0.5063655131295643 | 0.0052443008964012 | 0.5048745845804046  | T                  | T                   | T |
| 0.1707697577797966 | 0.3325436873782238 | 0.6707606332815154  | T                  | T                   | T |
| 0.1065200000000033 | 0.6835200000000015 | 0.3251800000000031  | F                  | F                   | F |
| 0.7765006348575767 | 0.0147370169707819 | 0.4939542421306986  | T                  | T                   | T |
| 0.4210894035433554 | 0.3373804409211386 | 0.6579338406734250  | T                  | T                   | T |
| 0.5994799999999998 | 0.4426500000000004 | 0.3473000000000042  | F                  | F                   | F |
| 0.2665710380986376 | 0.7774155689047565 | 0.5098189021625538  | T                  | T                   | T |
| 0.9288027108445768 | 0.1050079394452689 | 0.6852488787708763  | T                  | T                   | T |
| 0.0952800000000025 | 0.4426500000000004 | 0.3473000000000042  | F                  | F                   | F |
| 0.7664713793181972 | 0.7773293110687680 | 0.5143274907732568  | T                  | T                   | T |
| 0.4354162953436856 | 0.1159965368096227 | 0.6793969358845542  | T                  | T                   | T |
| 0.0727899999999977 | 0.9018900000000016 | 0.3251800000000031  | F                  | F                   | F |
| 0.7433708835124259 | 0.2294575408008300 | 0.4951086427213606  | T                  | T                   | T |
| 0.4040794656170409 | 0.5603597851885608 | 0.6613484398135180  | T                  | T                   | T |
| 0.5657599999999974 | 0.6610299999999967 | 0.3473000000000042  | F                  | F                   | F |
| 0.2336106702313199 | 0.9938165412715348 | 0.5176647229146970  | T                  | T                   | T |
| 0.8953737136758612 | 0.3235908041203784 | 0.6804139816382840  | T                  | T                   | T |
| 0.8403399999999976 | 0.1680700000000002 | 0.3362399999999965  | F                  | F                   | F |
| 0.5030435734929976 | 0.5025966120949061 | 0.5021465544197324  | T                  | T                   | T |
| 0.1634682685603070 | 0.8346072378119898 | 0.6714577195866556  | T                  | T                   | T |
| 0.5657599999999974 | 0.1568299999999994 | 0.3473000000000042  | F                  | F                   | F |
| 0.2315322843374992 | 0.4940351479599676 | 0.5104115990298604  | T                  | T                   | T |
| 0.9063697062701104 | 0.8327925547800683 | 0.6843537607562018  | T                  | T                   | T |
| 0.1065200000000033 | 0.1793100000000010 | 0.3251800000000031  | F                  | F                   | F |



|                    |                    |                    |   |   |   |
|--------------------|--------------------|--------------------|---|---|---|
| 0.7770659154910923 | 0.5138599715476235 | 0.4966917838370417 | T | T | T |
| 0.4483596305790315 | 0.8497621560459632 | 0.6586882645724377 | T | T | T |
| 0.5769999999999982 | 0.9018900000000016 | 0.3251800000000031 | F | F | F |
| 0.2409331901365772 | 0.2311286471764132 | 0.4913793041284149 | T | T | T |
| 0.9112149149566391 | 0.5651506166709712 | 0.6713639463840854 | T | T | T |
| 0.3473800000000011 | 0.9131300000000024 | 0.3473000000000042 | F | F | F |
| 0.0145924191530356 | 0.2439549057910406 | 0.5171475702683890 | T | T | T |
| 0.6933860955209147 | 0.5876980367470963 | 0.6713741032244053 | T | T | T |
| 0.3361400000000003 | 0.1680700000000002 | 0.3362399999999965 | F | F | F |
| 0.0026013306719207 | 0.5051965341481149 | 0.5051560065612113 | T | T | T |
| 0.6768256325265942 | 0.8489934734875746 | 0.6697247968901917 | T | T | T |
| 0.3361400000000003 | 0.6722699999999975 | 0.3362400000000036 | F | F | F |
| 0.0050005116155343 | 0.0043115107113030 | 0.5057096758969211 | T | T | T |
| 0.6775946246776201 | 0.3308299403875045 | 0.6753580578137882 | T | T | T |
| 0.2541799999999981 | 0.7461800000000025 | 0.3944800000000015 | F | F | F |
| 0.9222068023476675 | 0.0773211527869937 | 0.5659663235221480 | T | T | T |
| 0.0094700000000003 | 0.5311999999999983 | 0.3799399999999977 | F | F | F |
| 0.6752406040146071 | 0.8627777097838605 | 0.5484987620058012 | T | T | T |
| 0.3412571366380032 | 0.1888535910577747 | 0.7153381514259297 | T | T | T |
| 0.9439199999999985 | 0.1009499999999974 | 0.3071899999999985 | F | F | F |
| 0.6083238291036938 | 0.4371041464958193 | 0.4740140180995582 | T | T | T |
| 0.2819003647483735 | 0.7761204892291402 | 0.6619909323535222 | T | T | T |
| 0.9074600000000004 | 0.8429700000000011 | 0.3071899999999985 | F | F | F |
| 0.5730318043934377 | 0.1770420976372283 | 0.4750266568129999 | T | T | T |
| 0.2326043511595277 | 0.5109011462285888 | 0.6605881112066452 | T | T | T |
| 0.5217299999999980 | 0.9989399999999975 | 0.3799399999999977 | F | F | F |
| 0.1907482721947558 | 0.3324072347791976 | 0.5495603700365586 | T | T | T |
| 0.8507620097045151 | 0.6681331443283963 | 0.7149046729218134 | T | T | T |
| 0.4100400000000022 | 0.8281300000000016 | 0.2779999999999987 | F | F | F |
| 0.0771949080995711 | 0.1595889865356447 | 0.4470608390283979 | T | T | T |
| 0.7400007961682702 | 0.4854930178533039 | 0.6176603104264515 | T | T | T |
| 0.3978899999999967 | 0.0618100000000013 | 0.3019099999999995 | F | F | F |
| 0.0628042548037139 | 0.4001925094471486 | 0.4726323851542375 | T | T | T |
| 0.7298146167460757 | 0.7393928076713271 | 0.6356843882773678 | T | T | T |
| 0.0083500000000001 | 0.7340200000000010 | 0.3705700000000007 | F | F | F |
| 0.6702274287093608 | 0.0629991229062482 | 0.5392797257330330 | T | T | T |
| 0.3314236896849930 | 0.4018041812556653 | 0.7057776073295395 | T | T | T |
| 0.7367599999999968 | 0.2351799999999997 | 0.3652900000000017 | F | F | F |
| 0.4005214069920771 | 0.5698741045853020 | 0.5392761944203808 | T | T | T |
| 0.0734891680244481 | 0.9113183336211655 | 0.7105181446254306 | T | T | T |
| 0.6723300000000023 | 0.6105200000000011 | 0.3019099999999995 | F | F | F |
| 0.3413276374940263 | 0.9458942048068104 | 0.4729990573332817 | T | T | T |
| 0.0091039345076855 | 0.2803162262142489 | 0.6399040635028214 | T | T | T |
| 0.7340799999999987 | 0.0000599999999977 | 0.3705700000000007 | F | F | F |

|                    |                    |                    |   |   |   |
|--------------------|--------------------|--------------------|---|---|---|
| 0.3966099379253171 | 0.3390437687996312 | 0.5377336967758369 | T | T | T |
| 0.0716193502350413 | 0.6735035615950028 | 0.7060147135409841 | T | T | T |
| 0.4919900000000013 | 0.7542299999999997 | 0.3944800000000015 | F | F | F |
| 0.1610012030622785 | 0.0876447608056499 | 0.5658110392526360 | T | T | T |
| 0.8290494043282953 | 0.4136023627321158 | 0.7322446682884424 | T | T | T |
| 0.5068300000000008 | 0.2716500000000011 | 0.3652900000000017 | F | F | F |
| 0.1783775880314018 | 0.6103844030989672 | 0.5368318246711116 | T | T | T |
| 0.8421460997572670 | 0.9359125954317373 | 0.7099741594590150 | T | T | T |
| 0.1654399999999967 | 0.0644899999999993 | 0.3071899999999985 | F | F | F |
| 0.8319276755238104 | 0.3988791925788042 | 0.4741268055847068 | T | T | T |
| 0.4998121598562772 | 0.7265897122173935 | 0.6603515669455945 | T | T | T |
| 0.9465999999999966 | 0.3360800000000026 | 0.3019099999999995 | F | F | F |
| 0.6083017068272160 | 0.6674776798172083 | 0.4729284149598217 | T | T | T |
| 0.2757456653312643 | 0.9993248263416300 | 0.6413849787629923 | T | T | T |
| 0.6627999999999972 | 0.8133499999999998 | 0.2925400000000025 | F | F | F |
| 0.3302848214020795 | 0.1461353472956662 | 0.4608224129130030 | T | T | T |
| 0.9951032769974874 | 0.4774436076550691 | 0.6273387600366674 | T | T | T |
| 0.2622300000000024 | 0.5164199999999965 | 0.3944800000000015 | F | F | F |
| 0.9322369998909326 | 0.8490589370577837 | 0.5654937054742035 | T | T | T |
| 0.5888715352202636 | 0.1801699671430271 | 0.7314345524942975 | T | T | T |
| 0.4772099999999995 | 0.4866799999999998 | 0.3799399999999977 | F | F | F |
| 0.1463227335671107 | 0.8174720536894472 | 0.5504176477532889 | T | T | T |
| 0.8198422525326134 | 0.1574334308131701 | 0.7163356309880896 | T | T | T |
| 0.4180899999999994 | 0.5983700000000027 | 0.2779999999999987 | F | F | F |
| 0.0860486316638450 | 0.9298743807231639 | 0.4480919763519846 | T | T | T |
| 0.7512670805303623 | 0.2587871310730717 | 0.6119462876049413 | T | T | T |
| 0.2743899999999968 | 0.2743299999999991 | 0.3705700000000007 | F | F | F |
| 0.9408134484428714 | 0.6087134054578859 | 0.5428561716084777 | T | T | T |
| 0.6043959635632378 | 0.9364612893678953 | 0.7059535674210021 | T | T | T |
| 0.1802800000000033 | 0.5903199999999984 | 0.2779999999999987 | F | F | F |
| 0.8500137742668350 | 0.9236014180984895 | 0.4468864988493892 | T | T | T |
| 0.5211372261301941 | 0.2713528822867248 | 0.6177978034401618 | T | T | T |
| 0.1505500000000026 | 0.3456100000000006 | 0.2925400000000025 | F | F | F |
| 0.8212222377035392 | 0.6789577669567985 | 0.4598807999071554 | T | T | T |
| 0.4879516648705273 | 0.0150932515153875 | 0.6264439805629975 | T | T | T |
| 0.1950599999999980 | 0.8578600000000023 | 0.2925400000000025 | F | F | F |
| 0.8642255988368333 | 0.1865027241265409 | 0.4589812693318774 | T | T | T |
| 0.5319545225168921 | 0.5100916723758211 | 0.6392851794199886 | T | T | T |
| 0.7732299999999981 | 0.5015799999999970 | 0.3652900000000017 | F | F | F |
| 0.4352535589555874 | 0.8295459654127244 | 0.5373669257048925 | T | T | T |
| 0.0967128506555440 | 0.1657604442896335 | 0.7093601303304065 | T | T | T |

**Table S10** Optimized fractional coordinates of the catalyst model with Pt-V<sub>03</sub>.

In Pt O

|                     |                     |                     |
|---------------------|---------------------|---------------------|
| 1.0000000000000000  |                     |                     |
| 12.5091307398836005 | -7.2221500000000001 | 0.0000000000000000  |
| 0.0000000000000000  | 14.4443000000000001 | -0.0000000000000248 |
| 0.0000000000000000  | 0.0000000000000000  | 17.9854999999999983 |

|    |    |    |
|----|----|----|
| In | Pt | O  |
| 47 | 1  | 71 |

Selective dynamics

Direct

|                    |                    |                    |   |   |   |
|--------------------|--------------------|--------------------|---|---|---|
| 0.8515799999999984 | 0.4089299999999980 | 0.3472999999999971 | F | F | F |
| 0.5142035697783955 | 0.7415523605742129 | 0.5096993486533532 | T | T | T |
| 0.1690927113883294 | 0.0740686755192005 | 0.6866565085320548 | T | T | T |
| 0.8290999999999968 | 0.9356200000000001 | 0.3251800000000031 | F | F | F |
| 0.4937310800925677 | 0.2655372039231156 | 0.4975164031706043 | T | T | T |
| 0.1586875382826785 | 0.6024608010169137 | 0.6578903816685867 | T | T | T |
| 0.3248900000000035 | 0.4314099999999996 | 0.3251800000000031 | F | F | F |
| 0.9931443370335258 | 0.7645128327061574 | 0.4933507707813546 | T | T | T |
| 0.6614074298017467 | 0.0974034977874649 | 0.6696667985930554 | T | T | T |
| 0.8403399999999976 | 0.6722699999999975 | 0.3362400000000036 | F | F | F |
| 0.5077701135835552 | 0.0048944703222161 | 0.5034702716221238 | T | T | T |
| 0.1734374578705867 | 0.3321731076729049 | 0.6692432943727724 | T | T | T |
| 0.1065200000000033 | 0.6835200000000015 | 0.3251800000000031 | F | F | F |
| 0.7774262744023428 | 0.0158402420874129 | 0.4934056131638166 | T | T | T |
| 0.4519488375587594 | 0.3604381772117924 | 0.6626611624795300 | T | T | T |
| 0.5994799999999998 | 0.4426500000000004 | 0.3472999999999971 | F | F | F |
| 0.2673143616259080 | 0.7780546092667053 | 0.5103702334223564 | T | T | T |
| 0.9290787855280068 | 0.1047459003602511 | 0.6849722820866165 | T | T | T |
| 0.0952800000000025 | 0.4426500000000004 | 0.3472999999999971 | F | F | F |
| 0.7645980126235409 | 0.7753376765719961 | 0.5156270265792929 | T | T | T |
| 0.4398627726889322 | 0.1077916987153361 | 0.6794519497568930 | T | T | T |
| 0.0727899999999977 | 0.9018900000000016 | 0.3251800000000031 | F | F | F |
| 0.7424249474378877 | 0.2316181309647328 | 0.4980427675937559 | T | T | T |
| 0.4054823906289343 | 0.5594815710110378 | 0.6568488093642065 | T | T | T |
| 0.5657599999999974 | 0.6610299999999967 | 0.3472999999999971 | F | F | F |
| 0.2332078089983777 | 0.9944185292474258 | 0.5180494350103895 | T | T | T |
| 0.8919938847154678 | 0.3227465079295274 | 0.6777250973318615 | T | T | T |
| 0.8403399999999976 | 0.1680700000000002 | 0.3362399999999965 | F | F | F |
| 0.5038304762491759 | 0.5034750483935423 | 0.5014369053932667 | T | T | T |
| 0.1625303083827866 | 0.8336721229986305 | 0.6723849766681068 | T | T | T |
| 0.5657599999999974 | 0.1568299999999994 | 0.3472999999999971 | F | F | F |
| 0.2308861133532802 | 0.4944231079199395 | 0.5094864259622264 | T | T | T |
| 0.9016806452035844 | 0.8279534794945759 | 0.6834738226498382 | T | T | T |
| 0.1065200000000033 | 0.1793100000000010 | 0.3251800000000031 | F | F | F |

|                    |                    |                    |   |   |   |
|--------------------|--------------------|--------------------|---|---|---|
| 0.7773419333303357 | 0.5131696828698814 | 0.4976356582363784 | T | T | T |
| 0.4495031155347647 | 0.8479647474073313 | 0.6575730856342588 | T | T | T |
| 0.5769999999999982 | 0.9018900000000016 | 0.3251800000000031 | F | F | F |
| 0.2439856434982842 | 0.2322455189896301 | 0.4926997066811110 | T | T | T |
| 0.9103693922793692 | 0.5632296622669771 | 0.6706842872651301 | T | T | T |
| 0.3473800000000011 | 0.9131300000000024 | 0.3472999999999971 | F | F | F |
| 0.0154418168786914 | 0.2444455653390796 | 0.5166962123223525 | T | T | T |
| 0.6885105265515544 | 0.5747754209648687 | 0.6771129126166542 | T | T | T |
| 0.3361400000000003 | 0.1680700000000002 | 0.3362399999999965 | F | F | F |
| 0.0031126111971135 | 0.5057510595590914 | 0.5042817370659922 | T | T | T |
| 0.6769835299832843 | 0.8462590458250308 | 0.6691529797519841 | T | T | T |
| 0.3361400000000003 | 0.6722699999999975 | 0.3362400000000036 | F | F | F |
| 0.6719958243306616 | 0.3375297578367685 | 0.6907332112980238 | T | T | T |
| 0.0040997264558661 | 0.0037907392368683 | 0.5058370150659512 | T | T | T |
| 0.2541799999999981 | 0.7461800000000025 | 0.3944800000000015 | F | F | F |
| 0.9293629879837041 | 0.0739218283676370 | 0.5623205610282630 | T | T | T |
| 0.5934045097875053 | 0.4226980689835779 | 0.7320346334653317 | T | T | T |
| 0.0094700000000003 | 0.5311999999999983 | 0.3799399999999977 | F | F | F |
| 0.6776700214180604 | 0.8627746770317000 | 0.5474995319622780 | T | T | T |
| 0.9439199999999985 | 0.1009499999999974 | 0.3071899999999985 | F | F | F |
| 0.6087021106603572 | 0.4358273372753068 | 0.4736155144362237 | T | T | T |
| 0.2823309720154917 | 0.7771716422625580 | 0.6583512184910949 | T | T | T |
| 0.9074600000000004 | 0.8429700000000011 | 0.3071899999999985 | F | F | F |
| 0.5721739679005777 | 0.1763980132448678 | 0.4749421234638917 | T | T | T |
| 0.2334128063609524 | 0.5087439202304278 | 0.6603586871793700 | T | T | T |
| 0.5217299999999980 | 0.9989399999999975 | 0.3799399999999977 | F | F | F |
| 0.1902327833396916 | 0.3313357236852016 | 0.5473980557695547 | T | T | T |
| 0.8524781261318876 | 0.6667613930357290 | 0.7129813875363721 | T | T | T |
| 0.4100400000000022 | 0.8281300000000016 | 0.2779999999999987 | F | F | F |
| 0.0750454853500314 | 0.1492095545730205 | 0.4501356593456021 | T | T | T |
| 0.7468733507786502 | 0.4857632963302984 | 0.6145216540280626 | T | T | T |
| 0.3978899999999967 | 0.0618100000000013 | 0.3019099999999995 | F | F | F |
| 0.0632544243839736 | 0.4001214907398064 | 0.4716422000969435 | T | T | T |
| 0.7311318101804523 | 0.7351126388634296 | 0.6376825640550745 | T | T | T |
| 0.0083500000000001 | 0.7340200000000010 | 0.3705700000000007 | F | F | F |
| 0.6723269903707626 | 0.0642675203936783 | 0.5393128894731516 | T | T | T |
| 0.3370162243226945 | 0.3987819447743556 | 0.7019908142854328 | T | T | T |
| 0.7367599999999968 | 0.2351799999999997 | 0.3652900000000017 | F | F | F |
| 0.3977841852607663 | 0.5718299996662741 | 0.5355991752461581 | T | T | T |
| 0.0680974053931472 | 0.9058559945092342 | 0.7069107309320023 | T | T | T |
| 0.6723300000000023 | 0.6105200000000011 | 0.3019099999999995 | F | F | F |
| 0.3408933020846173 | 0.9463871007312271 | 0.4734978914305218 | T | T | T |
| 0.0076519793128158 | 0.2779699003711886 | 0.6370131548851937 | T | T | T |
| 0.7340799999999987 | 0.0000599999999977 | 0.3705700000000007 | F | F | F |

|                    |                    |                    |   |   |   |
|--------------------|--------------------|--------------------|---|---|---|
| 0.3991123802037990 | 0.3396342819451979 | 0.5382738330539282 | T | T | T |
| 0.0724356448308332 | 0.6716082331307812 | 0.7050933641759615 | T | T | T |
| 0.4919900000000013 | 0.7542299999999997 | 0.3944800000000015 | F | F | F |
| 0.1478814140268318 | 0.0776868233309435 | 0.5627669112936432 | T | T | T |
| 0.8334806194125957 | 0.4138078675323804 | 0.7344043326540111 | T | T | T |
| 0.5068300000000008 | 0.2716500000000011 | 0.3652900000000017 | F | F | F |
| 0.1786691935070901 | 0.6109118624142016 | 0.5365003614591740 | T | T | T |
| 0.8422651074644381 | 0.9359313649971120 | 0.7077216511832918 | T | T | T |
| 0.1654399999999967 | 0.0644899999999993 | 0.3071899999999985 | F | F | F |
| 0.8331966819404660 | 0.3988229737098466 | 0.4736960891127858 | T | T | T |
| 0.4999631788534108 | 0.7264869522262186 | 0.6577583363332439 | T | T | T |
| 0.9465999999999966 | 0.3360800000000026 | 0.3019099999999995 | F | F | F |
| 0.6091246420244126 | 0.6695242218345132 | 0.4704411435255451 | T | T | T |
| 0.2769163523762372 | 0.0107086613620082 | 0.6485671851580993 | T | T | T |
| 0.6627999999999972 | 0.8133499999999998 | 0.2925400000000025 | F | F | F |
| 0.3278442207173924 | 0.1447663731861726 | 0.4612620292865805 | T | T | T |
| 0.9952615084439327 | 0.4763539859811148 | 0.6254279913755942 | T | T | T |
| 0.2622300000000024 | 0.5164199999999965 | 0.3944800000000015 | F | F | F |
| 0.9336139864028211 | 0.8586959305974051 | 0.5613151175780918 | T | T | T |
| 0.5872726682437137 | 0.1747712418106466 | 0.7350423544478824 | T | T | T |
| 0.4772099999999995 | 0.4866799999999998 | 0.3799399999999977 | F | F | F |
| 0.1475359516637963 | 0.8227344596080038 | 0.5505013062154068 | T | T | T |
| 0.8201498002975861 | 0.1567386703661384 | 0.7140653300833586 | T | T | T |
| 0.4180899999999994 | 0.5983700000000027 | 0.2779999999999987 | F | F | F |
| 0.0785500189982647 | 0.9332246774041891 | 0.4502193688407413 | T | T | T |
| 0.7428738829442835 | 0.2596121435005235 | 0.6153517721176278 | T | T | T |
| 0.2743899999999968 | 0.2743299999999991 | 0.3705700000000007 | F | F | F |
| 0.9449701225032491 | 0.6114551631626060 | 0.5403300897590594 | T | T | T |
| 0.6057789899544226 | 0.9355318120770011 | 0.7045228734887395 | T | T | T |
| 0.1802800000000033 | 0.5903199999999984 | 0.2779999999999987 | F | F | F |
| 0.8590948049605069 | 0.9296179028921938 | 0.4493364796091242 | T | T | T |
| 0.5050982074496690 | 0.2549491138121799 | 0.6188403619814877 | T | T | T |
| 0.1505500000000026 | 0.3456100000000006 | 0.2925400000000025 | F | F | F |
| 0.8214110206155253 | 0.6798190309833333 | 0.4605987005400035 | T | T | T |
| 0.4890771379948098 | 0.0111337483830142 | 0.6242108410955407 | T | T | T |
| 0.1950599999999980 | 0.8578600000000023 | 0.2925400000000025 | F | F | F |
| 0.8647210004664736 | 0.1867487410158751 | 0.4601986738996786 | T | T | T |
| 0.5352524301224740 | 0.5266984988254930 | 0.6229953208490471 | T | T | T |
| 0.7732299999999981 | 0.5015799999999970 | 0.3652900000000017 | F | F | F |
| 0.4365398223722817 | 0.8301414587690085 | 0.5357717763740567 | T | T | T |
| 0.0960091062360646 | 0.1690809012269307 | 0.7120832254564564 | T | T | T |

**Table S11** Optimized fractional coordinates of the catalyst model with Pt-V<sub>04</sub>.

|                     |                     |                     |   |
|---------------------|---------------------|---------------------|---|
| In                  | Pt                  | In                  | O |
| 1.0000000000000000  |                     |                     |   |
| 12.5091307398836005 | -7.2221500000000001 | 0.0000000000000000  |   |
| 0.0000000000000000  | 14.4443000000000001 | -0.0000000000000248 |   |
| 0.0000000000000000  | 0.0000000000000000  | 17.9854999999999983 |   |

|    |    |    |    |
|----|----|----|----|
| In | Pt | In | O  |
| 46 | 1  | 1  | 71 |

Selective dynamics

Direct

|                    |                    |                    |   |   |   |
|--------------------|--------------------|--------------------|---|---|---|
| 0.8515799999999984 | 0.4089299999999980 | 0.3473000000000042 | F | F | F |
| 0.5146991917315433 | 0.7426905165528922 | 0.5097657926479854 | T | T | T |
| 0.1730695572510418 | 0.0779612298021915 | 0.6857476679774662 | T | T | T |
| 0.8290999999999968 | 0.9356200000000001 | 0.3251800000000031 | F | F | F |
| 0.4950077877757771 | 0.2669576574318344 | 0.4982818554070128 | T | T | T |
| 0.1585840932823588 | 0.6040454220781847 | 0.6571440741280442 | T | T | T |
| 0.3248900000000035 | 0.4314099999999996 | 0.3251800000000031 | F | F | F |
| 0.9924952252530788 | 0.7636456126659134 | 0.4933729854411072 | T | T | T |
| 0.6571043977652680 | 0.0988019799984270 | 0.6704711556098520 | T | T | T |
| 0.8403399999999976 | 0.6722699999999975 | 0.3362400000000036 | F | F | F |
| 0.5059243182581235 | 0.0065101069938020 | 0.5046436098064772 | T | T | T |
| 0.1829032606029490 | 0.3453154678622841 | 0.6681951233888972 | T | T | T |
| 0.1065200000000033 | 0.6835200000000015 | 0.3251800000000031 | F | F | F |
| 0.7765522686696540 | 0.0159976906767645 | 0.4942722712626733 | T | T | T |
| 0.4457845875187055 | 0.3502147842804971 | 0.6700608913665592 | T | T | T |
| 0.5994799999999998 | 0.4426500000000004 | 0.3473000000000042 | F | F | F |
| 0.2669821522361523 | 0.7780756488265760 | 0.5100010019065712 | T | T | T |
| 0.9308646023886904 | 0.0994069582346617 | 0.6876452230737267 | T | T | T |
| 0.0952800000000025 | 0.4426500000000004 | 0.3473000000000042 | F | F | F |
| 0.7642853690589720 | 0.7747432111391573 | 0.5168481659968934 | T | T | T |
| 0.4327324968018390 | 0.1163247767832093 | 0.6789432722141155 | T | T | T |
| 0.0727899999999977 | 0.9018900000000016 | 0.3251800000000031 | F | F | F |
| 0.7417887621548995 | 0.2310859079195862 | 0.4986401029942975 | T | T | T |
| 0.4109791657019813 | 0.5632158996079299 | 0.6569539039416502 | T | T | T |
| 0.5657599999999974 | 0.6610299999999967 | 0.3473000000000042 | F | F | F |
| 0.2328847061647327 | 0.9933991916224733 | 0.5184603068541577 | T | T | T |
| 0.8922454351392147 | 0.3205494550706847 | 0.6797070763053140 | T | T | T |
| 0.8403399999999976 | 0.1680700000000002 | 0.3362399999999965 | F | F | F |
| 0.5034648300678496 | 0.5021317010698545 | 0.5030169423408335 | T | T | T |
| 0.1609158057186184 | 0.8333902851588275 | 0.6703235722573864 | T | T | T |
| 0.5657599999999974 | 0.1568299999999994 | 0.3473000000000042 | F | F | F |
| 0.2322912377918707 | 0.4967924188758516 | 0.5094792513332398 | T | T | T |
| 0.9025547863787489 | 0.8271274573337276 | 0.6848571062913276 | T | T | T |
| 0.1065200000000033 | 0.1793100000000010 | 0.3251800000000031 | F | F | F |



|                    |                    |                    |   |   |   |
|--------------------|--------------------|--------------------|---|---|---|
| 0.7772050293406549 | 0.5128836552667173 | 0.4980720033382312 | T | T | T |
| 0.4485110979023185 | 0.8516217533952795 | 0.6575591098305522 | T | T | T |
| 0.5769999999999982 | 0.9018900000000016 | 0.3251800000000031 | F | F | F |
| 0.2451653511586181 | 0.2324432642472291 | 0.4926161686550395 | T | T | T |
| 0.9090423807605951 | 0.5614292373029901 | 0.6710042641545900 | T | T | T |
| 0.3473800000000011 | 0.9131300000000024 | 0.3473000000000042 | F | F | F |
| 0.0166550062951348 | 0.2436537012434312 | 0.5183180188134485 | T | T | T |
| 0.6865546978245147 | 0.5726548592228838 | 0.6777777029355644 | T | T | T |
| 0.3361400000000003 | 0.1680700000000002 | 0.3362399999999965 | F | F | F |
| 0.0023253553727313 | 0.5042480597536457 | 0.5046465465470992 | T | T | T |
| 0.6752752157164781 | 0.8457764954198620 | 0.6699634128871870 | T | T | T |
| 0.3361400000000003 | 0.6722699999999975 | 0.3362400000000036 | F | F | F |
| 0.0040344277825875 | 0.0041484440187892 | 0.5063898380844829 | T | T | T |
| 0.6707547381700567 | 0.3366173313016385 | 0.6897058943755311 | T | T | T |
| 0.2541799999999981 | 0.7461800000000025 | 0.3944800000000015 | F | F | F |
| 0.9294916928303237 | 0.0741763241047497 | 0.5637061432190570 | T | T | T |
| 0.5945718932381042 | 0.4230414669940515 | 0.7337498811758003 | T | T | T |
| 0.0094700000000003 | 0.5311999999999983 | 0.3799399999999977 | F | F | F |
| 0.6779975949460382 | 0.8630284081287111 | 0.5480941416334718 | T | T | T |
| 0.3380143401226979 | 0.1899656766333905 | 0.7124633988013214 | T | T | T |
| 0.9439199999999985 | 0.1009499999999974 | 0.3071899999999985 | F | F | F |
| 0.6093535100393093 | 0.4372057656202487 | 0.4726655921753133 | T | T | T |
| 0.2811012235195090 | 0.7769364981852078 | 0.6585998615911944 | T | T | T |
| 0.9074600000000004 | 0.8429700000000011 | 0.3071899999999985 | F | F | F |
| 0.5724187176613923 | 0.1767874378969160 | 0.4733744298242217 | T | T | T |
| 0.2378531068910900 | 0.5156556747169937 | 0.6574396977656810 | T | T | T |
| 0.5217299999999980 | 0.9989399999999975 | 0.3799399999999977 | F | F | F |
| 0.1914102507107991 | 0.3331749551809943 | 0.5473518356302136 | T | T | T |
| 0.8520616791295270 | 0.6660544050128571 | 0.7132323315556947 | T | T | T |
| 0.4100400000000022 | 0.8281300000000016 | 0.2779999999999987 | F | F | F |
| 0.0750496756555660 | 0.1497013969152920 | 0.4504487144642705 | T | T | T |
| 0.7480402951888180 | 0.4865798272131780 | 0.6147153124095687 | T | T | T |
| 0.3978899999999967 | 0.0618100000000013 | 0.3019099999999995 | F | F | F |
| 0.0631261455949126 | 0.3988984755008608 | 0.4728142916096632 | T | T | T |
| 0.7298573941211037 | 0.7337356013058568 | 0.6379931864809216 | T | T | T |
| 0.0083500000000001 | 0.7340200000000010 | 0.3705700000000007 | F | F | F |
| 0.6700259517801574 | 0.0635787364488179 | 0.5390397991439241 | T | T | T |
| 0.3387952083014680 | 0.4066268200285208 | 0.7061745799704656 | T | T | T |
| 0.7367599999999968 | 0.2351799999999997 | 0.3652900000000017 | F | F | F |
| 0.3991626142311823 | 0.5731446338679791 | 0.5356452315735538 | T | T | T |
| 0.0698834823186511 | 0.9068438091773047 | 0.7094027490562743 | T | T | T |
| 0.6723300000000023 | 0.6105200000000011 | 0.3019099999999995 | F | F | F |
| 0.3399879135944857 | 0.9457196084441380 | 0.4722744736820091 | T | T | T |
| 0.0169932342333494 | 0.2727088222656467 | 0.6473537651174432 | T | T | T |

|                    |                     |                    |   |   |   |
|--------------------|---------------------|--------------------|---|---|---|
| 0.7340799999999987 | 0.0000599999999977  | 0.3705700000000007 | F | F | F |
| 0.3980217394089672 | 0.3382864865337513  | 0.5393220904289503 | T | T | T |
| 0.0709360642695306 | 0.6711729083978732  | 0.7038769116211142 | T | T | T |
| 0.4919900000000013 | 0.7542299999999997  | 0.3944800000000015 | F | F | F |
| 0.1485134744700663 | 0.0804407532591047  | 0.5624116570950155 | T | T | T |
| 0.8334409723305702 | 0.4125610978550081  | 0.7344785413764811 | T | T | T |
| 0.5068300000000008 | 0.2716500000000011  | 0.3652900000000017 | F | F | F |
| 0.1774277119268303 | 0.6108911486284505  | 0.5357120914057023 | T | T | T |
| 0.8393124710411177 | 0.9311900419652630  | 0.7112656584233105 | T | T | T |
| 0.1654399999999967 | 0.0644899999999993  | 0.3071899999999985 | F | F | F |
| 0.8327866146014029 | 0.3981727826198992  | 0.4732737256553090 | T | T | T |
| 0.5004474940805276 | 0.7292271680556217  | 0.6582466986087816 | T | T | T |
| 0.9465999999999966 | 0.3360800000000026  | 0.3019099999999995 | F | F | F |
| 0.6090025850001523 | 0.6691284994418663  | 0.4709516950412450 | T | T | T |
| 0.2706507886537983 | -0.0001136045282533 | 0.6401295566963985 | T | T | T |
| 0.6627999999999972 | 0.8133499999999998  | 0.2925400000000025 | F | F | F |
| 0.3280896237891725 | 0.1440976140204423  | 0.4611457650034722 | T | T | T |
| 0.9963788308289925 | 0.4723195019544538  | 0.6259803602337504 | T | T | T |
| 0.2622300000000024 | 0.5164199999999965  | 0.3944800000000015 | F | F | F |
| 0.9340049374576197 | 0.8591053865949680  | 0.5624225513333083 | T | T | T |
| 0.5839900665456661 | 0.1747945206605981  | 0.7342353070765031 | T | T | T |
| 0.4772099999999995 | 0.4866799999999998  | 0.3799399999999977 | F | F | F |
| 0.1450741216915488 | 0.8187847494127027  | 0.5482198704132279 | T | T | T |
| 0.8202676449270502 | 0.1535254476057135  | 0.7097424302245120 | T | T | T |
| 0.4180899999999994 | 0.5983700000000027  | 0.2779999999999987 | F | F | F |
| 0.0779884386323637 | 0.9334166548176026  | 0.4507590873217243 | T | T | T |
| 0.7454822044767432 | 0.2602021108604211  | 0.6154032969264231 | T | T | T |
| 0.2743899999999968 | 0.2743299999999991  | 0.3705700000000007 | F | F | F |
| 0.9446031238450741 | 0.6097217859467187  | 0.5403560459812449 | T | T | T |
| 0.6047509040374296 | 0.9371632541702735  | 0.7039776013712933 | T | T | T |
| 0.1802800000000033 | 0.5903199999999984  | 0.2779999999999987 | F | F | F |
| 0.8592070051821541 | 0.9299919962944975  | 0.4502075269894798 | T | T | T |
| 0.5193611780567239 | 0.2629192306713781  | 0.6149853737949247 | T | T | T |
| 0.1505500000000026 | 0.3456100000000006  | 0.2925400000000025 | F | F | F |
| 0.8218105295024148 | 0.6800856979805214  | 0.4608116673132495 | T | T | T |
| 0.4846077094219561 | 0.0142769340899942  | 0.6253777548276285 | T | T | T |
| 0.1950599999999980 | 0.8578600000000023  | 0.2925400000000025 | F | F | F |
| 0.8653253396713378 | 0.1865540855083086  | 0.4614065326288142 | T | T | T |
| 0.5327087069721398 | 0.5222014534283375  | 0.6245074701589339 | T | T | T |
| 0.7732299999999981 | 0.5015799999999970  | 0.3652900000000017 | F | F | F |
| 0.4362003528142600 | 0.8309279690784750  | 0.5361086279133498 | T | T | T |

**Table S12** Optimized fractional coordinates of the catalyst model with Pt-V<sub>O6</sub>.

|                     |                      |                      |   |
|---------------------|----------------------|----------------------|---|
| In                  | Pt                   | In                   | O |
| 1.000000000000000   |                      |                      |   |
| 7.2221500012007906  | -12.5091307391902902 | 0.00000000000000060  |   |
| 0.00000000000000000 | 8.3394204937178671   | -11.7937215635675585 |   |
| 14.6850992550548085 | 8.4784460098618144   | 5.9951666679957052   |   |

|    |    |    |    |
|----|----|----|----|
| In | Pt | In | O  |
| 46 | 1  | 1  | 71 |

Selective dynamics

Direct

|                    |                    |                    |   |   |   |
|--------------------|--------------------|--------------------|---|---|---|
| 0.8515836378845805 | 0.4089291826345161 | 0.3472970745831390 | F | F | F |
| 0.5138774281850954 | 0.7414815708031497 | 0.5101873675033112 | T | T | T |
| 0.1768198674770328 | 0.0767968513058676 | 0.6843384219480754 | T | T | T |
| 0.8291001228075459 | 0.9356178259191950 | 0.3251822334614900 | F | F | F |
| 0.4952215789173156 | 0.2664414026139793 | 0.4960865270142480 | T | T | T |
| 0.1588393052158884 | 0.6036221813838484 | 0.6574284918173996 | T | T | T |
| 0.3248949945999087 | 0.4314126977115507 | 0.3251822334614900 | F | F | F |
| 0.9924195334836363 | 0.7633115888697333 | 0.4931795822608191 | T | T | T |
| 0.6600596454912132 | 0.0969641956242143 | 0.6698291985182783 | T | T | T |
| 0.8403418803460667 | 0.6722735042768520 | 0.3362396540223145 | F | F | F |
| 0.5066557073075106 | 0.0054167528912604 | 0.5044218973676239 | T | T | T |
| 0.1714812398071595 | 0.3322312790071765 | 0.6693725548579043 | T | T | T |
| 0.1065177031116420 | 0.6835152618153728 | 0.3251822334614900 | F | F | F |
| 0.7768216912713122 | 0.0157621099738446 | 0.4932720568349137 | T | T | T |
| 0.4241223162004544 | 0.3398664743129202 | 0.6580654186827660 | T | T | T |
| 0.5994810737807654 | 0.4426544552500715 | 0.3472970745831390 | F | F | F |
| 0.2671226745540508 | 0.7774021635480027 | 0.5099460505562008 | T | T | T |
| 0.9302505998258498 | 0.1041477408487896 | 0.6844292391097953 | T | T | T |
| 0.0952759455731211 | 0.4426544552500715 | 0.3472970745831461 | F | F | F |
| 0.7654573785568706 | 0.7766648787777600 | 0.5148242772901956 | T | T | T |
| 0.4355109372011883 | 0.1168340675441873 | 0.6783390566937584 | T | T | T |
| 0.0727924304960865 | 0.9018925533036395 | 0.3251822334614900 | F | F | F |
| 0.7430501773176872 | 0.2302226363967577 | 0.4955341195803835 | T | T | T |
| 0.4054409198513591 | 0.5600102764798401 | 0.6594007422095816 | T | T | T |
| 0.5657558011652100 | 0.6610317467383382 | 0.3472970745831461 | F | F | F |
| 0.2327848921163903 | 0.9924039750498298 | 0.5171275005452062 | T | T | T |
| 0.8951470971441430 | 0.3228418318354797 | 0.6796798912598105 | T | T | T |
| 0.8403418803460667 | 0.1680683760692148 | 0.3362396540223145 | F | F | F |
| 0.5039434601503653 | 0.5028029916625659 | 0.5028795964681543 | T | T | T |
| 0.1627015944144111 | 0.8341069333230289 | 0.6701279944911974 | T | T | T |
| 0.5657558011652100 | 0.1568266185306939 | 0.3472970745831461 | F | F | F |
| 0.2315007659939720 | 0.4944999976066441 | 0.5103315728327782 | T | T | T |
| 0.9065709338660191 | 0.8336355193588122 | 0.6836848618529590 | T | T | T |
| 0.1065177031116420 | 0.1793101336077285 | 0.3251822334614900 | F | F | F |

|                    |                    |                    |   |   |   |
|--------------------|--------------------|--------------------|---|---|---|
| 0.7761627123556268 | 0.5133609031448948 | 0.4984128215689396 | T | T | T |
| 0.4488976784899731 | 0.8502647136186694 | 0.6575677841641415 | T | T | T |
| 0.5769975587037308 | 0.9018925533036395 | 0.3251822334614900 | F | F | F |
| 0.2418080979905710 | 0.2301614248309529 | 0.4908105069218357 | T | T | T |
| 0.9112582228441454 | 0.5651936198023965 | 0.6718601492655181 | T | T | T |
| 0.3473785096769433 | 0.9131343108421603 | 0.3472970745831461 | F | F | F |
| 0.0158194125328951 | 0.2442678704794031 | 0.5163803085413124 | T | T | T |
| 0.6906911353112963 | 0.5851536871393359 | 0.6798010120441086 | T | T | T |
| 0.3361367521384224 | 0.1680683760692148 | 0.3362396540223145 | F | F | F |
| 0.0022690576560052 | 0.5052006110815108 | 0.5047610901443779 | T | T | T |
| 0.6768724127600425 | 0.8473304993987976 | 0.6687542219794521 | T | T | T |
| 0.3361367521384295 | 0.6722735042768520 | 0.3362396540223145 | F | F | F |
| 0.0046306742079199 | 0.0039865049519307 | 0.5058899361739662 | T | T | T |
| 0.6779526242388638 | 0.3327674357086196 | 0.6770811530502355 | T | T | T |
| 0.2541842590098113 | 0.7461778751490158 | 0.3944775844339503 | F | F | F |
| 0.9294932802735969 | 0.0740444926555031 | 0.5621144678085971 | T | T | T |
| 0.0094723336752622 | 0.5311979178146160 | 0.3799386832336822 | F | F | F |
| 0.6774237788043171 | 0.8635206148570492 | 0.5468009719457188 | T | T | T |
| 0.3396967722053547 | 0.1884228200220724 | 0.7128309389927936 | T | T | T |
| 0.9439217482440156 | 0.1009536314534927 | 0.3071906159917361 | F | F | F |
| 0.6084365646025516 | 0.4370382321519304 | 0.4739756161020519 | T | T | T |
| 0.2818591961599293 | 0.7768727745330773 | 0.6577514368957554 | T | T | T |
| 0.9074566249617817 | 0.8429681167905230 | 0.3071906159917361 | F | F | F |
| 0.5724310125686120 | 0.1765183640472009 | 0.4752083322643387 | T | T | T |
| 0.2324545739475431 | 0.5098372502966165 | 0.6566876060987852 | T | T | T |
| 0.5217255841393538 | 0.9989379227400192 | 0.3799386832336822 | F | F | F |
| 0.1900877659270539 | 0.3301841217541661 | 0.5474978146867030 | T | T | T |
| 0.8562551466775935 | 0.6718258322998428 | 0.7133529306125416 | T | T | T |
| 0.4100411230105863 | 0.8281303682776340 | 0.2780017236106858 | F | F | F |
| 0.0741266252260893 | 0.1488266263954454 | 0.4494390789853888 | T | T | T |
| 0.7410854689792284 | 0.4871068092695400 | 0.6190167046707671 | T | T | T |
| 0.3978860819165106 | 0.0618058007524454 | 0.3019131806672561 | F | F | F |
| 0.0630814090766997 | 0.3998686749645772 | 0.4722476835276559 | T | T | T |
| 0.7328283279588097 | 0.7385722139996294 | 0.6349425427939029 | T | T | T |
| 0.0083537854409172 | 0.7340228340549402 | 0.3705661273773728 | F | F | F |
| 0.6711498351778253 | 0.0636735246591927 | 0.5394839307627411 | T | T | T |
| 0.3314236796714683 | 0.4018425869504173 | 0.7053346720829871 | T | T | T |
| 0.7367620124481107 | 0.2351831206849297 | 0.3652886920528999 | F | F | F |
| 0.3998247256408935 | 0.5697979297963410 | 0.5374117269281968 | T | T | T |
| 0.0736231174467899 | 0.9110304822411650 | 0.7093970972954418 | T | T | T |
| 0.6723299752512091 | 0.6105241744987708 | 0.3019131806672561 | F | F | F |
| 0.3405901871471277 | 0.9454468274350172 | 0.4726092623406218 | T | T | T |
| 0.0081246875284025 | 0.2771634242998440 | 0.6378357441052994 | T | T | T |
| 0.7340793050292973 | 0.0000564709743571 | 0.3705661273773728 | F | F | F |

|                    |                    |                    |   |   |   |
|--------------------|--------------------|--------------------|---|---|---|
| 0.3958473949179252 | 0.3369536268406112 | 0.5374350053130610 | T | T | T |
| 0.0732310635452386 | 0.6733214052003645 | 0.7055607000106210 | T | T | T |
| 0.4919936161392044 | 0.7542259974054701 | 0.3944775844339503 | F | F | F |
| 0.1494433990647129 | 0.0791513822420519 | 0.5619892948124823 | T | T | T |
| 0.8308968260647347 | 0.4132705335142347 | 0.7328383893828151 | T | T | T |
| 0.5068313646520934 | 0.2716482439671637 | 0.3652886920528999 | F | F | F |
| 0.1772842463515446 | 0.6104360202004864 | 0.5357324406473510 | T | T | T |
| 0.8426376223444167 | 0.9366749244688486 | 0.7084934385380831 | T | T | T |
| 0.1654421396247585 | 0.0644885081712587 | 0.3071906159917361 | F | F | F |
| 0.8320650589148419 | 0.3991509097698991 | 0.4745618917651197 | T | T | T |
| 0.5003682436134845 | 0.7270944584220468 | 0.6565312797545936 | T | T | T |
| 0.9466044556628361 | 0.3360802811640724 | 0.3019131806672561 | F | F | F |
| 0.6086869387994827 | 0.6683112953351542 | 0.4719697645211601 | T | T | T |
| 0.2743475573853980 | 0.0003129275834443 | 0.6388725211398214 | T | T | T |
| 0.6628011706015897 | 0.8133490907390950 | 0.2925406248109539 | F | F | F |
| 0.3286005217561188 | 0.1444765689384716 | 0.4614730602812622 | T | T | T |
| 0.9951260983441805 | 0.4765375072540876 | 0.6266979808701224 | T | T | T |
| 0.2622323812662657 | 0.5164166402760770 | 0.3944775844339503 | F | F | F |
| 0.9357239254265917 | 0.8600064309720358 | 0.5617494803542972 | T | T | T |
| 0.5884218568099484 | 0.1800828941324652 | 0.7313909656173233 | T | T | T |
| 0.4772123386006655 | 0.4866846722759277 | 0.3799386832336822 | F | F | F |
| 0.1446993173953786 | 0.8180510734213786 | 0.5483405331516555 | T | T | T |
| 0.8205853065417834 | 0.1560766276066192 | 0.7144533026687410 | T | T | T |
| 0.4180892452670406 | 0.5983691334046952 | 0.2780017236106858 | F | F | F |
| 0.0785210335652271 | 0.9331730008768689 | 0.4502270977557718 | T | T | T |
| 0.7501731023797580 | 0.2588701882883244 | 0.6124865068997367 | T | T | T |
| 0.2743874223603413 | 0.2743309513859842 | 0.3705661273773728 | F | F | F |
| 0.9409471372925988 | 0.6091889293076098 | 0.5427972338688901 | T | T | T |
| 0.6049898618574819 | 0.9360280076636686 | 0.7046987764201736 | T | T | T |
| 0.1802798881376475 | 0.5903210111482409 | 0.2780017236106858 | F | F | F |
| 0.8603708581296990 | 0.9301825537541495 | 0.4495863326329861 | T | T | T |
| 0.5217261254759084 | 0.2713773634329418 | 0.6174960894080816 | T | T | T |
| 0.1505479201374982 | 0.3456090858136918 | 0.2925406248109539 | F | F | F |
| 0.8215710699529126 | 0.6800108323303651 | 0.4606969044697543 | T | T | T |
| 0.4874958730520458 | 0.0152742542391515 | 0.6260384936426063 | T | T | T |
| 0.1950611656761865 | 0.8578623362777833 | 0.2925406248109539 | F | F | F |
| 0.8650383835707429 | 0.1862978656352900 | 0.4600501876074425 | T | T | T |
| 0.5309646499211992 | 0.5118486675055224 | 0.6335297061631294 | T | T | T |
| 0.7732271357303446 | 0.5015788917631880 | 0.3652886920528999 | F | F | F |
| 0.4365710251032552 | 0.8309562783883737 | 0.5361574274840634 | T | T | T |
| 0.0975949167250010 | 0.1656028200398918 | 0.7079163870469315 | T | T | T |
